# Supplementary material for: A Polyphenol-Enriched Supplement Exerts Potent Epigenetic-Protective Activity in a Cell-Based Model of Brain Ischemia
Source: PubMed Central journal article supplement (PMC6412333; doi:10.3390/nu11020345), 2019-02-06
Supplement: nutrients-11-00345-s001.pdf [file nutrients-11-00345-s001.pdf]

## **MEETAB CERTIFICATE OF ANALYSIS**

### **Components of products provided to the University of Brescia:**

- MY HEALTH MEETAB
- MY ANTIOXIDANT MEETAB

Products Formula: **Meetab s.r.l.**

Contractor: Naturfarma s.r.l..

Raw materials analysis performed by Naturfarma s.r.l. (contractor)

NATUR-FARMA s.r.l. is authorized to produce and package supplements by manufacturability approval No. CE IT 027 VR 00025 – registration/authorization: 050ND03082 (Pressana-VR) plant - 050ND08612. Follows the PROCEDURES for GOOD MANUFACTURING PRACTICE, according to the Code of Federal Regulations, Title 21, Volume 2, part 111, Certificate Number P2869.

Use of any information from the Technical Data Sheet and from CoA(s) is permitted with prior approval from Meetab.

Signed:

MEETAB SRL



## FORMULA MY HEALTH

Pag. 1 di 2

| <b>Analysis for 1 tablet</b> | <b>mg</b> |
|------------------------------|-----------|
| Vitamin C                    | 250       |
| Vitamin E                    | 60        |
| Fruit Extract                | 50        |
| Broccoli extract             | 50        |
| L-Glutamine                  | 50        |
| Vitamin B3                   | 35        |
| of which Nicotinamide        | 30        |
| of which Nicotinic Acid      | 5         |
| Potassium                    | 25        |
| Vitamin B1                   | 25        |
| L-Lysine                     | 25        |
| trace Salts                  | 20        |
| L-Proline                    | 20        |
| Zinc                         | 12,5      |
| L-Glycine                    | 10        |
| N-Acetyl L-Cysteine          | 10        |
| Vitamin B6                   | 9         |
| Manganese                    | 8         |
| Beta Carotene                | 7         |
| Vitamin B5                   | 5         |
| Choline Bitartrate           | 5         |
| Inositol                     | 5         |
| PABA                         | 5         |
| L-Arginine                   | 5         |
| L-Leucine                    | 5         |
| L-Histidine                  | 5         |
| L-isoleucine                 | 5         |
| L-Valine                     | 5         |
| L-Methionine                 | 5         |
| L-Tyrosine                   | 5         |
| Vitamin B2                   | 4,8       |
| L-Glutamic acid              | 2,5       |
| L-Phenylalanine              | 2,5       |
| L-Serine                     | 2,5       |
| L-Threonine                  | 2,5       |
| L-Alanine                    | 2,5       |
| L-Aspartic Acid              | 2,5       |
| L-Citrulline                 | 2,5       |
| L-Taurine                    | 2,5       |
| L-Tryptophan                 | 2,5       |

Pag. 2 di 2

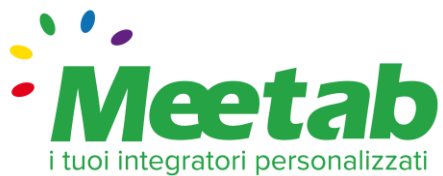

|                      |       |
|----------------------|-------|
| Copper               | 1,8   |
| Methylfolate         | 0,4   |
| Biotin               | 0,2   |
| Chrome               | 0,2   |
| Selenium             | 0,08  |
| Sodium Molybdate     | 0,05  |
| Vitamin K2 (Mena Q7) | 0,045 |
| Vitamin B12          | 0,03  |
| Vitamin D3           | 0,025 |
| Magnesium Citrate    | 10    |
| Calcium              | 50    |

| <b>CERTIFICATO D'ANALISI</b><br>CERTIFICATE OF ANALYSIS                  |                                                     |
|--------------------------------------------------------------------------|-----------------------------------------------------|
| <b>PRODOTTO</b>                                                          | <b>VITAMINA C ACIDO L-ASCORBICO USP/BP/FCC/E300</b> |
| <b>LOT.</b>                                                              | 201701116                                           |
| <b>DESCRIPTION</b>                                                       | WHITE ALMOST WHITE CRYSTALS – CRYSTALLINE POWDER    |
| <b>IDENTIFICATION</b>                                                    | POSITIVE (POSITIVE REACTION)                        |
| <b>MELTING POINT</b>                                                     | CONFORM (ABOUT 190°C)                               |
| <b>PH</b>                                                                | 2.37                                                |
| <b>SPECIFIC ROTATION</b>                                                 | 21.04°                                              |
| <b>CLARITY OF SOLUTION</b>                                               | CLEAR                                               |
| <b>COLOR OF SOLUTION</b>                                                 | < BY7                                               |
| <b>COPPER</b>                                                            | <5 ppm                                              |
| <b>HEAVY METALS</b>                                                      | <10 ppm                                             |
| <b>MERCURY</b>                                                           | <0.1 mg/kg                                          |
| <b>LEAD</b>                                                              | <2 mg/kg                                            |
| <b>ARSENIC</b>                                                           | <3 ppm                                              |
| <b>CADMIUM</b>                                                           | <1 mg/kg                                            |
| <b>OXALIC ACID</b>                                                       | <0.2%                                               |
| <b>IRON</b>                                                              | <2 ppm                                              |
| <b>LOSS ON DRYING</b>                                                    | < 0.0%                                              |
| <b>SULPHATE ASH</b>                                                      | <0.1%                                               |
| <b>ORGANIC VOLATILE IMPURITIES</b>                                       | PASS                                                |
| <b>MESH</b>                                                              | PASS                                                |
| <b>ASSAY</b>                                                             | 99.75%                                              |
| <b>TOTAL PLATE COUNT</b>                                                 | <10 cfu/g                                           |
| <b>YEAST AND MOLDS</b>                                                   | <10 cfu/g                                           |
| <b>E.COLI</b>                                                            | Absence/1 g                                         |
| <b>SALMONELLA</b>                                                        | Absence/25 g                                        |
| <b>COPY CONFORM TO THE ORIGINAL DOCUMENT – VALID ALTHOUGH NOT SIGNED</b> |                                                     |

| <b>CERTIFICATO D'ANALISI</b><br>CERTIFICATE OF ANALYSIS                  |                                                         |
|--------------------------------------------------------------------------|---------------------------------------------------------|
| <b>PRODOTTO</b>                                                          | <b>D-alpha tocopheryl acetate Vit E NAT</b>             |
| <b>LOT.</b>                                                              | S20160701                                               |
| <b>DESCRIPTION</b>                                                       | Almost white, yellowish or light brown, small particles |
| <b>IDENTIFICATION</b>                                                    | POSITIVE (POSITIVE REACTION)                            |
| <b>ASSAY</b>                                                             | 703 IU                                                  |
| <b>LOSS ON DRYING</b>                                                    | 2.46%                                                   |
| <b>BULK DENSITY</b>                                                      | 0.480 g/cm <sup>3</sup>                                 |
| <b>PARTICLE SIZE</b>                                                     | Residue on 40 meshes =/< 1% CONFORM                     |
| <b>BENZO(A)PYRENE</b>                                                    | <2 ppb                                                  |
| <b>HEAVY METALS (as Pb)</b>                                              | <10 ppm                                                 |
| <b>MERCURY</b>                                                           | <0.1 mg/kg                                              |
| <b>LEAD</b>                                                              | <2 mg/kg                                                |
| <b>ARSENIC</b>                                                           | <1 mg/kg                                                |
| <b>CADMIUM</b>                                                           | <1 mg/kg                                                |
| <b>TOTAL BACTERIAL COUNT</b>                                             | <1000 cfu/g CONFORM                                     |
| <b>YEAST AND MOLDS</b>                                                   | <100 cfu/g CONFORM                                      |
| <b>COLIFORM</b>                                                          | <0.3 MNP/g NEGATIVE                                     |
| <b>SALMONELLA</b>                                                        | Negative/25 g                                           |
| <b>STAPHYLOCOCCUS AUREUS</b>                                             | Negative/1 g                                            |
| <b>COPY CONFORM TO THE ORIGINAL DOCUMENT – VALID ALTHOUGH NOT SIGNED</b> |                                                         |

| <b>CERTIFICATO D'ANALISI</b><br>CERTIFICATE OF ANALYSIS                  |                                                             |
|--------------------------------------------------------------------------|-------------------------------------------------------------|
| <b>PRODOTTO</b>                                                          | <b>NATURAL SOURCE VITAMIN E (MIXED NATURAL TOCOPHEROLS)</b> |
| <b>LOT.</b>                                                              | T(13590-0399)TPA                                            |
| <b>APPEARANCE</b>                                                        | Clear, white to cream fine powder                           |
| <b>TASTE</b>                                                             | Bland, characteristic                                       |
| <b>ODOUR</b>                                                             | Bland to none                                               |
| <b>TOCOPHEROLS CONTENT</b>                                               | min. 335 mg/g mixed tocopherols                             |
| <b>SPECIFIC GRAVITY/DENSITY (25°C)</b>                                   | 0.58 g/cm <sup>3</sup>                                      |
| <b>ACIDITY (as mixed tocopherols)</b>                                    | <0.35 ml KOH 0.1N/f                                         |
| <b>LOSS ON DRYING</b>                                                    | <5%                                                         |
| <b>BENZO(A)PYRENE</b>                                                    | <2 ppb                                                      |
| <b>HEAVY METALS (for mixed tocopherols)</b>                              |                                                             |
| <b>MERCURY</b>                                                           | <0.1 ppm                                                    |
| <b>LEAD</b>                                                              | <0.1 ppm                                                    |
| <b>ARSENIC</b>                                                           | <1 ppm                                                      |
| <b>CADMIUM</b>                                                           | < 1 ppm                                                     |
| <b>TOTAL AEROBIC COUNT</b>                                               | <1000 cfu/g CONFORM                                         |
| <b>YEAST AND MOLDS</b>                                                   | <100 cfu/g CONFORM                                          |
| <b>E. COLI</b>                                                           | Negative cfu/g                                              |
| <b>SALMONELLA</b>                                                        | Negative/25 g                                               |
| <b>STAPHYLOCOCCUS AUREUS</b>                                             | Negative/1 g                                                |
| <b>COPY CONFORM TO THE ORIGINAL DOCUMENT – VALID ALTHOUGH NOT SIGNED</b> |                                                             |

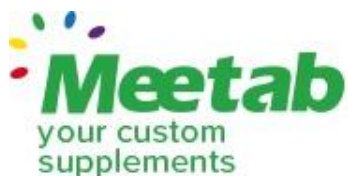

via G. Rossetti 19  
20145 Milano (MI)  
Italy

| <b>CERTIFICATO D'ANALISI</b>                                             |                                                   |
|--------------------------------------------------------------------------|---------------------------------------------------|
| CERTIFICATE OF ANALYSIS                                                  |                                                   |
| <b>PRODUCT</b>                                                           | <b>VITAMIN PP -NICOTINAMIDE</b>                   |
| <b>LOT.</b>                                                              | OP11708013                                        |
| <b>APPEARANCE</b>                                                        | Crystalline Powder                                |
| <b>COLOUR</b>                                                            | White                                             |
| <b>IDENTIFICATION (IR,USP,EP,JP)</b>                                     | Conforms                                          |
| <b>CLARITY OF SOLUTION (5 g in 100 ml water)</b>                         | 0.17                                              |
| <b>pH (sol. 5 g in 100 ml water)</b>                                     | 6.4                                               |
| <b>LOSS ON DRYING (EP)</b>                                               | 0.0% w/w                                          |
| <b>MELTING RANGE (START/END)</b>                                         | 128.7-129.1°C                                     |
| <b>PARTICLE SIZE FRACTION</b>                                            | >50 micron 100% (=>90%)<br>> 250 micron 0% (<=8%) |
| <b>SULFATE ASH</b>                                                       | <0.05%                                            |
| <b>CHLORIDE</b>                                                          | <70 mg/Kg                                         |
| <b>SULFATE</b>                                                           | <190 mg/kg                                        |
| <b>HEAVY METALS</b>                                                      | <20 mg/Kg                                         |
| <b>ASSAY (HPLC)</b>                                                      | 99.8%                                             |
| <b>CONFORM TO CURRENT REQUIR OF EP,USP,FCC</b>                           | Conforms                                          |
| <b>TOTAL PLATE COUNT</b>                                                 | Conforms                                          |
| <b>YEAST &amp; MOLD</b>                                                  | Conforms                                          |
| <b>E. COLI</b>                                                           | Negative                                          |
| <b>SALMONELLA</b>                                                        | Negative                                          |
| <b>COPY CONFORM TO THE ORIGINAL DOCUMENT – VALID ALTHOUGH NOT SIGNED</b> |                                                   |

| <b>CERTIFICATO D'ANALISI</b><br>CERTIFICATE OF ANALYSIS                  |                                                                                                                                                         |
|--------------------------------------------------------------------------|---------------------------------------------------------------------------------------------------------------------------------------------------------|
| <b>PRODUCT</b>                                                           | <b>NICOTINIC ACID</b>                                                                                                                                   |
| <b>LOT.</b>                                                              | 16-17/NCN[P]/B/093                                                                                                                                      |
| <b>APPEARANCE</b>                                                        | White cristalline powder                                                                                                                                |
| <b>SOLUBILITY</b>                                                        | Sparingly soluble in water, soluble in boiling water and in boiling ethanol (96%) and in dilute solution of alkali hydroxides and carbonates – Complies |
| <b>MELTING POINT</b>                                                     | 237°C                                                                                                                                                   |
| <b>IR TEST</b>                                                           | Matches                                                                                                                                                 |
| <b>RELATED SUBSTANCE</b>                                                 | Complies                                                                                                                                                |
| <b>HEAVY METAL</b>                                                       | <20 ppm                                                                                                                                                 |
| <b>LOSS ON DRYING</b>                                                    | 0.23% w/w                                                                                                                                               |
| <b>SULPHATED ASH/RESIDUE ON IGNITION</b>                                 | 0.027% w/w                                                                                                                                              |
| <b>CHLORIDE</b>                                                          | <200ppm                                                                                                                                                 |
| <b>SULPHATE</b>                                                          | N.A.                                                                                                                                                    |
| <b>ASSAY</b>                                                             | 99.75% w/w                                                                                                                                              |
| <b>LEAD</b>                                                              | Less than 3mg/kg                                                                                                                                        |
| <b>ARSENIC</b>                                                           | Less than 1mg/kg                                                                                                                                        |
| <b>CADMIUM</b>                                                           | Less than 1mg/kg                                                                                                                                        |
| <b>MERCURY</b>                                                           | Less than 0.1mg/kg                                                                                                                                      |
| <b>TOTAL PLATE COUNT</b>                                                 | <30 cfu/g                                                                                                                                               |
| <b>YEAST &amp; MOLD</b>                                                  | < 10 cfu/g                                                                                                                                              |
| <b>STAPHYLOCOCCUS AUREUS</b>                                             | Negative                                                                                                                                                |
| <b>E. COLI</b>                                                           | Negative                                                                                                                                                |
| <b>SALMONELLA</b>                                                        | Negative                                                                                                                                                |
| <b>COPY CONFORM TO THE ORIGINAL DOCUMENT – VALID ALTHOUGH NOT SIGNED</b> |                                                                                                                                                         |





via G. Rossetti 19  
20145 Milano (MI)  
Italy

| <b>CERTIFICATO D'ANALISI</b>                                             |                                |
|--------------------------------------------------------------------------|--------------------------------|
| CERTIFICATE OF ANALYSIS                                                  |                                |
| <b>PRODUCT</b>                                                           | <b>VITAMIN B1 HCl (TIAMIN)</b> |
| <b>LOT.</b>                                                              | Y01201610005                   |
| <b>APPEARANCE</b>                                                        | White cristalline powder       |
| <b>IDENTIFICATION</b>                                                    | Conforms                       |
| <b>ASPECT</b>                                                            | Conforms                       |
| <b>pH</b>                                                                | 3.0                            |
| <b>SULPHATE</b>                                                          | <300 ppm                       |
| <b>NITRATE (ppm)</b>                                                     | Conforms                       |
| <b>HEAVY METAL</b>                                                       | <10 ppm                        |
| <b>LEAD</b>                                                              | <2 ppm                         |
| <b>ARSENIC</b>                                                           | < 3 ppm                        |
| <b>CADMIUM</b>                                                           | <1 ppm                         |
| <b>MERCURY</b>                                                           | <1 ppm                         |
| <b>ASSAY</b>                                                             | 100%                           |
| <b>TOTAL PLATE COUNT</b>                                                 | <1000 cfu/g                    |
| <b>YEAST &amp; MOLD</b>                                                  | < 100 cfu/g                    |
| <b>STAPHYLOCOCCUS AUREUS</b>                                             | Negative                       |
| <b>E. COLI</b>                                                           | Negative                       |
| <b>SALMONELLA</b>                                                        | Negative                       |
| <b>CONCLUSION</b>                                                        | Product conform to EP-USP, FCC |
| <b>COPY CONFORM TO THE ORIGINAL DOCUMENT – VALID ALTHOUGH NOT SIGNED</b> |                                |



via G. Rossetti 19  
20145 Milano (MI)  
Italy

| <b>CERTIFICATO D'ANALISI</b><br>CERTIFICATE OF ANALYSIS                  |                                       |
|--------------------------------------------------------------------------|---------------------------------------|
| <b>PRODOTTO</b>                                                          | <b>VITAMIN K2 MK-7</b>                |
| <b>LOT.</b>                                                              | 1703                                  |
| <b>ORIGIN</b>                                                            | BACILLUS LICHENIFORMIS; FERMENTED     |
| <b>APPEARANCE</b>                                                        | POWDER                                |
| <b>COLOUR</b>                                                            | YELLOW TO PALE YELLOW                 |
| <b>ASSAY/RATIO: VITAMIN K2 (MK-7)</b>                                    | Min. 2000 ppm (Observation: 2367 ppm) |
| <b>LOSS ON DRYING</b>                                                    | 2.7%                                  |
| <b>PARTICLE SIZE</b>                                                     | Min. 95% pass 40 mesh                 |
| <b>HEAVY METAL</b>                                                       | < 5 ppm                               |
| <b>ARSENIC</b>                                                           | <0.5 ppm                              |
| <b>TOTAL PLATE COUNT</b>                                                 | < 10,000 cfu/g                        |
| <b>YEAST AND MOULDS</b>                                                  | <100 cfu/g                            |
| <b>E.COLI</b>                                                            | Negative/10 g                         |
| <b>STAPHYLOCOCCUS AUREUS</b>                                             | Negative/10 g                         |
| <b>SALMONELLA</b>                                                        | Negative/10 g                         |
|                                                                          |                                       |
| <b>COPY CONFORM TO THE ORIGINAL DOCUMENT – VALID ALTHOUGH NOT SIGNED</b> |                                       |



via G. Rossetti 19  
20145 Milano (MI)  
Italy

| <b>CERTIFICATO D'ANALISI</b>                                             |                                     |
|--------------------------------------------------------------------------|-------------------------------------|
| CERTIFICATE OF ANALYSIS                                                  |                                     |
| <b>PRODUCT</b>                                                           | <b>PYRIDOXAL 5-PHOSPHATE</b>        |
| <b>LOT.</b>                                                              | C041612804                          |
| <b>DESCRIPTION</b>                                                       | SLIGHTLY YELLOW OR OFF-WHITE POWDER |
| <b>IDENTIFICATION</b>                                                    | Conforms                            |
| <b>SOLUBILITY</b>                                                        | Conforms                            |
| <b>MELTING POINT</b>                                                     | 142°C                               |
| <b>WATER by KF</b>                                                       | 8.3%                                |
| <b>HEAVY METALS</b>                                                      | <10 ppm                             |
| <b>LEAD</b>                                                              | <1 ppm                              |
| <b>ARSENIC</b>                                                           | <1 ppm                              |
| <b>MERCURY</b>                                                           | <0.1 ppm                            |
| <b>CADMIUM</b>                                                           | <1 ppm                              |
| <b>pH (in 0.25% water)</b>                                               | 2.7                                 |
| <b>PARTICLE SIZE (MESH)</b>                                              | Conforms                            |
| <b>BULK DENSITY</b>                                                      | 0.37 ml                             |
| <b>TAPPED DENSITY</b>                                                    | 0.64 g/ml                           |
| <b>ASSAY (ON DRIED BASIS)</b>                                            | 99.2%                               |
| <b>RESIDUAL SOLVENT</b>                                                  | Conforms                            |
| <b>TOLENE</b>                                                            | Conforms                            |
| <b>TOTAL PLATE COUNT</b>                                                 | <100 cfu/g                          |
| <b>YEAST &amp; MOLD</b>                                                  | <10 cfu/g                           |
| <b>E. COLI</b>                                                           | Negative                            |
| <b>SALMONELLA</b>                                                        | Negative                            |
| <b>COLIFORMS</b>                                                         | Negative                            |
| <b>COPY CONFORM TO THE ORIGINAL DOCUMENT – VALID ALTHOUGH NOT SIGNED</b> |                                     |



via G. Rossetti 19  
20145 Milano (MI)  
Italy

| <b>CERTIFICATO D'ANALISI</b><br>CERTIFICATE OF ANALYSIS                  |                                |
|--------------------------------------------------------------------------|--------------------------------|
| <b>PRODOTTO</b>                                                          | <b>BETACAROTENE</b>            |
| <b>LOT.</b>                                                              | 6091711003                     |
| <b>APPEARANCE</b>                                                        | Cristalline Fine powder        |
| <b>COLOR</b>                                                             | Brown/Red                      |
| <b>ODOUR</b>                                                             | Bland                          |
| <b>MELTING POINT</b>                                                     | 177-179°C                      |
| <b>RESIDUAL SOLVENT</b>                                                  | Conforms                       |
| <b>IDENTIFICATION (BETACAROTENE)</b>                                     | CONFORM                        |
| <b>IDENTIFICATION (IR)</b>                                               | CONFORM                        |
| <b>LOSS ON DRYING</b>                                                    | 0.01%                          |
| <b>HEAVY METALS</b>                                                      | <10 ppm CONFORM                |
| <b>MERCURY</b>                                                           | <0.1 ppm CONFORM               |
| <b>LEAD</b>                                                              | <2 ppm CONFORM                 |
| <b>ARSENIC</b>                                                           | <1 ppm CONFORM                 |
| <b>CADMIUM</b>                                                           | < 1 ppm CONFORM                |
| <b>TOTAL AEROBIC COUNT</b>                                               | <1000 cfu/g CONFORM (80 UFC/g) |
| <b>YEAST AND MOLDS</b>                                                   | <100 cfu/g CONFORM (<10 UFC/g) |
| <b>E. COLI</b>                                                           | Negative cfu/g                 |
| <b>SALMONELLA</b>                                                        | Negative/25 g                  |
| <b>TITTLE</b>                                                            | 99.5% BETACAROTENE             |
| <b>COPY CONFORM TO THE ORIGINAL DOCUMENT – VALID ALTHOUGH NOT SIGNED</b> |                                |



via G. Rossetti 19  
20145 Milano (MI)  
Italy

| <b>CERTIFICATO D'ANALISI</b>                                             |                                                      |
|--------------------------------------------------------------------------|------------------------------------------------------|
| CERTIFICATE OF ANALYSIS                                                  |                                                      |
| <b>PRODUCT</b>                                                           | <b>HYDROXOCOBALAMINE ACETATE – VIT. B12</b>          |
| <b>LOT.</b>                                                              | A17243E                                              |
| <b>APPEARANCE</b>                                                        | Crystalline powder or dark red crystals              |
| <b>IDENTIFICATION</b>                                                    | Conforms                                             |
| <b>A525/A531</b>                                                         | 0.33                                                 |
| <b>A274/A351</b>                                                         | 0.8                                                  |
| <b>pH</b>                                                                | 6.0                                                  |
| <b>LOSS ON WEIGHT</b>                                                    | 11.1%                                                |
| <b>SUM OF IMPURITY</b>                                                   | <5.0%                                                |
| <b>SPECTRUMPHOTOMETRIC ASSAY</b>                                         | 97.5% sps                                            |
| <b>ACETONE (GC)</b>                                                      | 738 ppm                                              |
| <b>METHANOL (GC)</b>                                                     | <1000 ppm                                            |
| <b>HEAVY METALS</b>                                                      | Conforms                                             |
| <b>TOTAL PLATE COUNT</b>                                                 | <1000 cfu/g                                          |
| <b>YEAST &amp; MOLD</b>                                                  | <100 cfu/g                                           |
| <b>E. COLI</b>                                                           | Negative                                             |
| <b>SALMONELLA</b>                                                        | Negative                                             |
| <b>BACTERIAN ENDOTOXINE</b>                                              | <=0.4 Complies                                       |
| <b>CONCLUSION</b>                                                        | This product meets with the specification of Ph. Eur |
| <b>COPY CONFORM TO THE ORIGINAL DOCUMENT – VALID ALTHOUGH NOT SIGNED</b> |                                                      |

| <b>CERTIFICATO D'ANALISI</b>                                             |                                            |
|--------------------------------------------------------------------------|--------------------------------------------|
| CERTIFICATE OF ANALYSIS                                                  |                                            |
| <b>PRODUCT</b>                                                           | <b>VITAMIN B5 (D-CALCIUM PANTOTHENATE)</b> |
| <b>LOT.</b>                                                              | 16061404                                   |
| <b>APPEARANCE</b>                                                        | WHITE OR ALMOST WHITE POWDER               |
| <b>INFRARED ABSORBATION</b>                                              | Up to standard figure                      |
| <b>IDENTIFICATION OF CALCIUM ION</b>                                     | Normal reaction                            |
| <b>pH VALUE</b>                                                          | Conform (6.8-8.0)                          |
| <b>ALKALINITY</b>                                                        | Conform                                    |
| <b>SPECIFIC ROTATION</b>                                                 | +26.8°C                                    |
| <b>LEAD</b>                                                              | <3 ppm                                     |
| <b>ARSENIC</b>                                                           | <1 ppm                                     |
| <b>CADMIUM</b>                                                           | <1 ppm                                     |
| <b>MERCURY</b>                                                           | <0.1 ppm                                   |
| <b>IMPURITY CONTENT</b>                                                  | Conform <1%                                |
| <b>HEAVY METALS</b>                                                      | <=0.002%                                   |
| <b>NITROGEN CONTENT</b>                                                  | 5.8%                                       |
| <b>CALCIUM CONTENT</b>                                                   | 8.3%                                       |
| <b>LOSS ON DRYING</b>                                                    | 2.2%                                       |
| <b>RESIDUAL SOLVENT</b>                                                  | 0.11%                                      |
| <b>TOTAL PLATE COUNT</b>                                                 | <1000 cfu/g                                |
| <b>YEAST &amp; MOLD</b>                                                  | <100 cfu/g                                 |
| <b>E. COLI</b>                                                           | Negative/10 g                              |
| <b>SALMONELLA</b>                                                        | Negative/25 g                              |
| <b>ASSAY</b>                                                             | 99.2%                                      |
| <b>CONCLUSION</b>                                                        | Complies with USP39                        |
| <b>COPY CONFORM TO THE ORIGINAL DOCUMENT – VALID ALTHOUGH NOT SIGNED</b> |                                            |



via G. Rossetti 19  
20145 Milano (MI)  
Italy

| <b>CERTIFICATO D'ANALISI</b>                                             |                                |
|--------------------------------------------------------------------------|--------------------------------|
| CERTIFICATE OF ANALYSIS                                                  |                                |
| <b>PRODUCT</b>                                                           | <b>VITAMIN B2 (Riboflavin)</b> |
| <b>LOT.</b>                                                              | 17D10-B11-PPR1717485           |
| <b>APPEARANCE</b>                                                        | YELLOW- ORANGE POWDER          |
| <b>IDENTIFICATION</b>                                                    | Conforms                       |
| <b>SPECIFIC ROTATION</b>                                                 | Conforms                       |
| <b>ABSORBANCE (Ph. Eur.)</b>                                             | Conforms                       |
| <b>LUMIFLAVIN (USP)</b>                                                  | 0.0052                         |
| <b>SULPHUR ASH</b>                                                       | 0.08/100 g                     |
| <b>RESIDUE ON IGNITION</b>                                               | 0.08%                          |
| <b>LOSS ON DRYING</b>                                                    | 1.0g/100g                      |
| <b>ASSAY</b>                                                             | 99.9%                          |
| <b>HEAVY METALS</b>                                                      | <10 ppm                        |
| <b>LEAD</b>                                                              | <2 ppm                         |
| <b>ARSENIC</b>                                                           | <1 ppm                         |
| <b>CADMIUM</b>                                                           | <1 ppm                         |
| <b>MERCURY</b>                                                           | <0.1 ppm                       |
| <b>TOTAL PLATE COUNT</b>                                                 | <1000 cfu/g                    |
| <b>YEAST &amp; MOLD</b>                                                  | <100 cfu/g                     |
| <b>E. COLI</b>                                                           | Negative/10 g                  |
| <b>SALMONELLA</b>                                                        | Negative/25 g                  |
| <b>PSUDOMONAS AERUGINOSA</b>                                             | Negative/g                     |
| <b>STAPHYLOCOCCUS AUREUS</b>                                             | Negative/g                     |
| <b>COPY CONFORM TO THE ORIGINAL DOCUMENT – VALID ALTHOUGH NOT SIGNED</b> |                                |



via G. Rossetti 19  
20145 Milano (MI)  
Italy

| <b>CERTIFICATO D'ANALISI</b><br>CERTIFICATE OF ANALYSIS                  |                                     |
|--------------------------------------------------------------------------|-------------------------------------|
| <b>PRODUCT</b>                                                           | <b>VITAMIN D3 100000 IU/g</b>       |
| <b>LOT.</b>                                                              | 5431-1712001                        |
| <b>APPEARANCE</b>                                                        | White to off White/Yellowish Powder |
| <b>IDENTIFICATION</b>                                                    | Conforms                            |
| <b>ASSAY</b>                                                             | Min. 100000 IU/g                    |
| <b>SIEVE ANALYSIS</b>                                                    | 100% Pass 40 Mesh Conforms          |
| <b>LOSS ON DRYING</b>                                                    | 3.91%                               |
| <b>ARSENIC</b>                                                           | Conforms (<0.5 ppm)                 |
| <b>LEAD</b>                                                              | Conforms ( 0.5 ppm)                 |
| <b>CADMIUM</b>                                                           | Conforms (<0.1 ppm)                 |
| <b>MERCURY</b>                                                           | Conforms (<0.1 ppm)                 |
| <b>TOTAL PLATE COUNT</b>                                                 | 10 cfu/g (<1000 cfu/g)              |
| <b>YEAST &amp; MOLD</b>                                                  | 10 cfu/g (<100 cfu/g)               |
| <b>E. COLI</b>                                                           | Negative                            |
| <b>SALMONELLA</b>                                                        | Negative                            |
| <b>STAPHYLOCOCCUS AUREUS</b>                                             | Negative                            |
| <b>COLIFORMS</b>                                                         | Negative                            |
| <b>GMO/BSE/TSE/GLUTEN</b>                                                | Absent                              |
| <b>COPY CONFORM TO THE ORIGINAL DOCUMENT – VALID ALTHOUGH NOT SIGNED</b> |                                     |





via G. Rossetti 19  
20145 Milano (MI)  
Italy

| <b>CERTIFICATO D'ANALISI</b><br>CERTIFICATE OF ANALYSIS                  |                                       |
|--------------------------------------------------------------------------|---------------------------------------|
| <b>PRODUCT</b>                                                           | <b>D-BIOTIN (VIT H)</b>               |
|                                                                          |                                       |
| <b>LOT.</b>                                                              | VH20160702C                           |
|                                                                          |                                       |
| <b>APPEARANCE</b>                                                        | White or off white crystalline powder |
| <b>SOLUBILITY</b>                                                        | Conforms                              |
| <b>IDENTIFICATION</b>                                                    | Conforms                              |
| <b>CLEAR AND COLOUR</b>                                                  | Conforms                              |
| <b>HEAVY METALS</b>                                                      | <10 ppm                               |
| <b>LEAD</b>                                                              | <2 ppm                                |
| <b>SULPHATED ASH</b>                                                     | 0.07%                                 |
| <b>SPECIFIC OPTICAL ROTATION</b>                                         | 90.7°                                 |
| <b>MELTING POINT</b>                                                     | Conforms                              |
| <b>ORGANIC VOLATILE IMPURITY</b>                                         | Conforms                              |
| <b>ASSAY</b>                                                             | 99.9%                                 |
| <b>RELATED SUBSTANCES</b>                                                | Conforms                              |
| <b>LOSS ON DRYNG</b>                                                     | 0.08%                                 |
| <b>TOTAL PLATE COUNT</b>                                                 | <1000 cfu/g                           |
| <b>YEAST &amp; MOLD</b>                                                  | <100 cfu/g                            |
| <b>E. COLI</b>                                                           | Negative                              |
| <b>SALMONELLA</b>                                                        | Negative                              |
| <b>CONCLUSION</b>                                                        | Conforms to USP38/EP8                 |
|                                                                          |                                       |
| <b>COPY CONFORM TO THE ORIGINAL DOCUMENT – VALID ALTHOUGH NOT SIGNED</b> |                                       |



via G. Rossetti 19  
20145 Milano (MI)  
Italy

| <b>CERTIFICATO D'ANALISI</b><br>CERTIFICATE OF ANALYSIS                  |                                                                                                                                            |
|--------------------------------------------------------------------------|--------------------------------------------------------------------------------------------------------------------------------------------|
| <b>PRODUCT</b>                                                           | <b>(6S)-5-METHYLTETRAHYDROFOLIC ACID, GLUCOSAMINE SALT (QUATREFOLIC®)</b>                                                                  |
| <b>LOT.</b>                                                              | 0001701113                                                                                                                                 |
| <b>APPEARANCE</b>                                                        | Creamy to light brown powder                                                                                                               |
| <b>MOLECULAR FORMULA</b>                                                 | C <sub>20</sub> H <sub>23</sub> N <sub>7</sub> O <sub>6</sub> (C <sub>6</sub> H <sub>14</sub> N <sub>5</sub> O <sub>5</sub> ) <sub>2</sub> |
| <b>MOLECULAR WEIGHT</b>                                                  | 817.80                                                                                                                                     |
| <b>IDENTIFICATION (IR)</b>                                               | Conforms                                                                                                                                   |
| <b>WATER CONTENT (K.F.)</b>                                              | <=8.0%                                                                                                                                     |
| <b>GLUCOSAMINE ASSAY ON D.B. (HPLC)</b>                                  | 34-36%                                                                                                                                     |
| <b>5-METHYLTETRAHYDROFOLIC ACID ASSAY ON D.B. (HPLC)</b>                 | 54-59%                                                                                                                                     |
| <b>TOTAL IMPURITIES</b>                                                  | <=2.5%                                                                                                                                     |
| <b>LEAD</b>                                                              | <=0.3 ppm                                                                                                                                  |
| <b>ARSENIC</b>                                                           | <=1.5 ppm                                                                                                                                  |
| <b>MERCURY</b>                                                           | <=0.1 ppm                                                                                                                                  |
| <b>CADMIUM</b>                                                           | <=0.5 ppm                                                                                                                                  |
| <b>BORON</b>                                                             | <=10 ppm                                                                                                                                   |
| <b>TOTAL PLATE COUNT</b>                                                 | <100 cfu/g                                                                                                                                 |
| <b>YEAST &amp; MOLD</b>                                                  | <100 cfu/g                                                                                                                                 |
| <b>E. COLI</b>                                                           | Negative/10 g                                                                                                                              |
| <b>SALMONELLA</b>                                                        | Negative 25/g                                                                                                                              |
| <b>ASSAY (ON DRIED BASIS)</b>                                            | 99.0%                                                                                                                                      |
| <b>COPY CONFORM TO THE ORIGINAL DOCUMENT – VALID ALTHOUGH NOT SIGNED</b> |                                                                                                                                            |



via G. Rossetti 19  
20145 Milano (MI)  
Italy

| <b>CERTIFICATO D'ANALISI</b>                                             |                                  |
|--------------------------------------------------------------------------|----------------------------------|
| CERTIFICATE OF ANALYSIS                                                  |                                  |
| <b>PRODUCT</b>                                                           | <b>L-GLUTAMINE KYOWA QUALITY</b> |
| <b>LOT.</b>                                                              | GM-PL-17462                      |
| <b>APPEARANCE</b>                                                        | White Crystalline Powder         |
| <b>IDENTIFICATION</b>                                                    | Conforms                         |
| <b>STATE OF SOLUTION</b>                                                 | NLT 99.2%                        |
| <b>pH</b>                                                                | 5.1                              |
| <b>SPECIFIC ROTATION (AT 20°C)</b>                                       | +7.0                             |
| <b>CHLORIDE</b>                                                          | NMT 0.020%                       |
| <b>SULFATE</b>                                                           | NMT 0.020%                       |
| <b>IRON</b>                                                              | NMT 100 ppm                      |
| <b>HAVY METALS</b>                                                       | NMT 5 ppm                        |
| <b>LEAD</b>                                                              | NMT 5 ppm                        |
| <b>ARSENIC</b>                                                           | NMT 1 ppm                        |
| <b>FOREIGN AMINO ACID</b>                                                | NMT 0.5%                         |
| <b>LOSS ON DRYING</b>                                                    | 0.01%                            |
| <b>RESIDUE OF IGNITION</b>                                               | 0.01%                            |
| <b>ASSAY (DRIED BASIS)</b>                                               | 99.5%                            |
| <b>TOTAL COUNT (CFU)</b>                                                 | NMT 1.000/g                      |
| <b>YEST AND MOLDS (CFU)</b>                                              | NMT 100/g                        |
| <b>COLIFORM</b>                                                          | NEG                              |
| <b>INSOLUBLE FOREIGN MATTER</b>                                          | Conforms                         |
| <b>COPY CONFORM TO THE ORIGINAL DOCUMENT – VALID ALTHOUGH NOT SIGNED</b> |                                  |

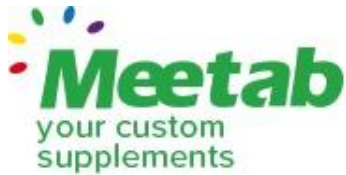

via G. Rossetti 19  
20145 Milano (MI)  
Italy

| <b>CERTIFICATO D'ANALISI</b>                                                |                                                                                                                                                                                                                                                                                                  |
|-----------------------------------------------------------------------------|--------------------------------------------------------------------------------------------------------------------------------------------------------------------------------------------------------------------------------------------------------------------------------------------------|
| CERTIFICATE OF ANALYSIS                                                     |                                                                                                                                                                                                                                                                                                  |
| <b>PRODOTTO</b>                                                             | <b>Amino acid Mix:</b> L-Lysine HCl, L-Proline, L-Glycine, N-acetyl-L-Cysteine, L-Arginine, L-Leucine, L-Histidine, L-Isoleucine, L-Valine, L-Methionine, L-Tyrosine, L-Glutamic Acid, L-Phenylalanine, L-Serine, L-Threonine, L-Alanine, L-Aspartic Acid, L-Citrulline, L-Taurine, L-Tryptophan |
| <b>LOT.</b>                                                                 | 201217                                                                                                                                                                                                                                                                                           |
| <b>APPEARANCE</b>                                                           | White crystalline powder or colorless crystals                                                                                                                                                                                                                                                   |
| <b>STATE OF SOLUTION</b>                                                    | >95%                                                                                                                                                                                                                                                                                             |
| <b>CHLORIDE</b>                                                             | <=0.02%                                                                                                                                                                                                                                                                                          |
| <b>AMMONIUM</b>                                                             | <=0.02%                                                                                                                                                                                                                                                                                          |
| <b>SULFATE</b>                                                              | <=0.02%                                                                                                                                                                                                                                                                                          |
| <b>MERCURY</b>                                                              | <0.1 ppm                                                                                                                                                                                                                                                                                         |
| <b>LEAD</b>                                                                 | < 5 ppm                                                                                                                                                                                                                                                                                          |
| <b>ARSENIC</b>                                                              | <1 ppm                                                                                                                                                                                                                                                                                           |
| <b>CADMIUM</b>                                                              | < 1 ppm                                                                                                                                                                                                                                                                                          |
| <b>HEAVY METALS</b>                                                         | <= 10 ppm                                                                                                                                                                                                                                                                                        |
| <b>LOSS ON DRYING</b>                                                       | <=0.2%                                                                                                                                                                                                                                                                                           |
| <b>RESIDUE ON IGNITION</b>                                                  | <=0.10%                                                                                                                                                                                                                                                                                          |
| <b>TOTAL PLATE COUNT</b>                                                    | <1000 cfu/g CONFORM                                                                                                                                                                                                                                                                              |
| <b>YEAST AND MOLDS</b>                                                      | <100 cfu/g CONFORM                                                                                                                                                                                                                                                                               |
| <b>E. COLI</b>                                                              | Negative cfu/g                                                                                                                                                                                                                                                                                   |
| <b>SALMONELLA</b>                                                           | Negative/25 g                                                                                                                                                                                                                                                                                    |
| <b>ASSAY</b>                                                                | 99.5%                                                                                                                                                                                                                                                                                            |
| <b>CONCLUSION</b>                                                           | Product conform to USP36/USP/24FCC/AJ192/JP15                                                                                                                                                                                                                                                    |
| <b>COPY CONFORM TO THE ORIGINAL DOCUMENT(s) – VALID ALTHOUGH NOT SIGNED</b> |                                                                                                                                                                                                                                                                                                  |

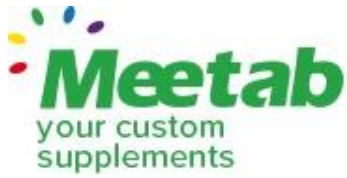

via G. Rossetti 19  
20145 Milano (MI)  
Italy

| <b>CERTIFICATO D'ANALISI</b><br>CERTIFICATE OF ANALYSIS                  |                                         |
|--------------------------------------------------------------------------|-----------------------------------------|
| <b>PRODUCT</b>                                                           | <b>TRI-MAGNESIUM CITRATE-NONHYDRATE</b> |
| <b>LOT.</b>                                                              | 4210065                                 |
| <b>APPEARANCE</b>                                                        | White crystalline powder                |
| <b>IDENTIFICATION</b>                                                    | Pass test                               |
| <b>pH (5%)</b>                                                           | 6.8                                     |
| <b>CALCIUM</b>                                                           | Less than 1%                            |
| <b>CHLORIDE</b>                                                          | Less than 500 ppm                       |
| <b>IRON</b>                                                              | Less than 200 ppm                       |
| <b>LOD</b>                                                               | 27.48%                                  |
| <b>LEAD</b>                                                              | Less than 0.5 ppm                       |
| <b>OXALATE</b>                                                           | Less than 100 ppm                       |
| <b>SULFATE</b>                                                           | Less than 0.2%                          |
| <b>HEAVY METALS</b>                                                      | Less than 5 ppm                         |
| <b>Mg (on dry basis)</b>                                                 | 16%                                     |
| <b>COPY CONFORM TO THE ORIGINAL DOCUMENT – VALID ALTHOUGH NOT SIGNED</b> |                                         |

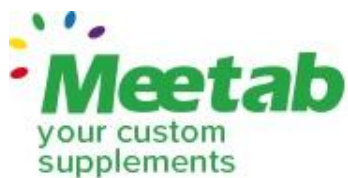

via G. Rossetti 19  
20145 Milano (MI)  
Italy

| <b>CERTIFICATO D'ANALISI</b>                                             |                                                |
|--------------------------------------------------------------------------|------------------------------------------------|
| CERTIFICATE OF ANALYSIS                                                  |                                                |
| <b>PRODOTTO</b>                                                          | <b>POTASSIO CITRATO</b>                        |
| LOT.                                                                     | 17105-B16                                      |
| <b>LOSS ON DRYING</b>                                                    | <6% (5.6%)                                     |
| <b>APPEARANCE</b>                                                        | White crystalline powder or colorless crystals |
| <b>IDENTIFICATION A</b>                                                  | CONFORM                                        |
| <b>TITTLE</b>                                                            | 99.4%                                          |
| <b>Ph</b>                                                                | 8.6                                            |
| <b>OSSALATI</b>                                                          | CONFORM                                        |
| <b>MERCURY</b>                                                           | <1 ppm CONFORM                                 |
| <b>LEAD</b>                                                              | <2 ppm CONFORM                                 |
| <b>ARSENIC</b>                                                           | <1 ppm CONFORM                                 |
| <b>HEAVY METALS</b>                                                      | <5 ppm CONFORM                                 |
| <b>TOTAL AEROBIC COUNT</b>                                               | CONFORM                                        |
| <b>YEAST AND MOLDS</b>                                                   | CONFORM                                        |
| <b>COPY CONFORM TO THE ORIGINAL DOCUMENT – VALID ALTHOUGH NOT SIGNED</b> |                                                |

| <b>CERTIFICATO D'ANALISI</b><br>CERTIFICATE OF ANALYSIS                  |                            |
|--------------------------------------------------------------------------|----------------------------|
| <b>PRODOTTO</b>                                                          | <b>MANGANESE GLUCONATO</b> |
| <b>LOT.</b>                                                              | 20141101                   |
| <b>APPEARANCE</b>                                                        | Fine powder                |
| <b>COLOR</b>                                                             | ALMOST WHITE/ROSE          |
| <b>IDENTIFICATION</b>                                                    | CONFORM                    |
| <b>UMIDITA'</b>                                                          | 6.8%                       |
| <b>SPLFATI</b>                                                           | 0.02%                      |
| <b>CLORURI</b>                                                           | conform                    |
| <b>LEAD</b>                                                              | <5 ppm CONFORM             |
| <b>CADMIUM</b>                                                           | < 3 ppm CONFORM            |
| <b>SOST. RIDUCENTI</b>                                                   | 0.2%                       |
| <b>IMPUREZZE ORGANICHE VOLATILI</b>                                      | CONFORME                   |
| <b>HEAVY METALS</b>                                                      | <20 ppm CONFORM            |
| <b>TITOLO SU BASE ANIDRA</b>                                             | 99.8%                      |
| <b>CONTENUTO DI MANGANESE</b>                                            | 12.31%                     |
| <b>TOTAL AEROBIC COUNT</b>                                               | <1000 cfu/g CONFORM        |
| <b>YEAST AND MOLDS</b>                                                   | <100 cfu/g CONFORM         |
| <b>E. COLI</b>                                                           | Negative cfu/g             |
| <b>SALMONELLA</b>                                                        | Negative/25 g              |
| <b>GLUTEN</b>                                                            | FREE                       |
| <b>COPY CONFORM TO THE ORIGINAL DOCUMENT – VALID ALTHOUGH NOT SIGNED</b> |                            |

| <b>CERTIFICATO D'ANALISI</b><br>CERTIFICATE OF ANALYSIS                  |                                                                                                                                                                                                                                                                                                                 |
|--------------------------------------------------------------------------|-----------------------------------------------------------------------------------------------------------------------------------------------------------------------------------------------------------------------------------------------------------------------------------------------------------------|
| <b>PRODOTTO</b>                                                          | <b>OXXYNEA® (MIX SOLUBILE DI ESTRATTI DA FRUTTA E VERDURA)</b>                                                                                                                                                                                                                                                  |
| <b>LOT.</b>                                                              | OXFP170316                                                                                                                                                                                                                                                                                                      |
| <b>TIPO DI PREPARAZIONE UTILIZZATA</b>                                   | Polvere ad alto potere antiossidante ottenuta da una miscela di frutti e verdure standardizzata in valore ORAC (1 g = 3500 valori ORAC)                                                                                                                                                                         |
| <b>ORIGINE</b>                                                           | France, Spain, Italy                                                                                                                                                                                                                                                                                            |
| <b>ASPECT</b>                                                            | Fine powder                                                                                                                                                                                                                                                                                                     |
| <b>COLOUR</b>                                                            | Brown                                                                                                                                                                                                                                                                                                           |
| <b>TASTE</b>                                                             | Characteristic                                                                                                                                                                                                                                                                                                  |
| <b>ODOR</b>                                                              | Typical                                                                                                                                                                                                                                                                                                         |
| <b>COMPOSITION</b>                                                       | Estratto da frutta 40-50%: Semi d'uva (rossa, bianca), Arancia, Pompelmo, Papaia, Ananas, Fragole, Ciliegie, Mela, Albicocca, Mirtillo, Ribes nero.<br>Estratto da vegetali: 30-40%: Pomodoro, Carote, Cocomero, Tè verde, Broccoli, Cavolo, Cipolla, Aglio, Asparago, Olive, Cetriolo.<br>Maltodestrina 10-20% |
| <b>TOTAL POLYPHENOLS (% CATECHINE EQ.)</b>                               | 83.41%                                                                                                                                                                                                                                                                                                          |
| <b>ORAC VALUE (µmol TE/g)</b>                                            | 11773.1%                                                                                                                                                                                                                                                                                                        |
| <b>LOSS ON DRYING %</b>                                                  | 0.1%                                                                                                                                                                                                                                                                                                            |
| <b>ASH %</b>                                                             | 1.5%                                                                                                                                                                                                                                                                                                            |
| <b>SOLUBILITY (1% W/V)</b>                                               | CONFORMS                                                                                                                                                                                                                                                                                                        |
| <b>Ph (10% W/V)</b>                                                      | 4.4                                                                                                                                                                                                                                                                                                             |
| <b>BULK DENSITY</b>                                                      | 0.50                                                                                                                                                                                                                                                                                                            |
| <b>TAPPED DENSITY</b>                                                    | 0.70                                                                                                                                                                                                                                                                                                            |
| <b>MESH SIZE (US mesh)</b>                                               | CONFORMS                                                                                                                                                                                                                                                                                                        |
| <b>ARSENIC (As)</b>                                                      | <0.1 ppm                                                                                                                                                                                                                                                                                                        |
| <b>CADMIUM (Cd)</b>                                                      | 0.01% ppm                                                                                                                                                                                                                                                                                                       |
| <b>MERCURY (Hg)</b>                                                      | <0.005 ppm                                                                                                                                                                                                                                                                                                      |
| <b>LEAD (Pb)</b>                                                         | 0.06 ppm                                                                                                                                                                                                                                                                                                        |
| <b>TOTAL PLATE COUNT</b>                                                 | <1000 cfu/g CONFORM                                                                                                                                                                                                                                                                                             |
| <b>YEAST AND MOLDS</b>                                                   | <100 cfu/g CONFORM                                                                                                                                                                                                                                                                                              |
| <b>COLIFORMS</b>                                                         | Negative cfu/1 g                                                                                                                                                                                                                                                                                                |
| <b>SALMONELLA</b>                                                        | Negative/25 g                                                                                                                                                                                                                                                                                                   |
| <b>STAPHYLOCOCCUS AUREUS</b>                                             | Negative cfu/1 g                                                                                                                                                                                                                                                                                                |
| <b>COPY CONFORM TO THE ORIGINAL DOCUMENT – VALID ALTHOUGH NOT SIGNED</b> |                                                                                                                                                                                                                                                                                                                 |



| <b>CERTIFICATO D'ANALISI</b><br>CERTIFICATE OF ANALYSIS                  |                                                                |
|--------------------------------------------------------------------------|----------------------------------------------------------------|
| <b>PRODUCT NAME</b>                                                      | <b>BROCCOLI 1:25</b>                                           |
| <b>LOT.</b>                                                              | NUT/16/0896                                                    |
| <b>BOTANICAL NAME</b>                                                    | Brassica oleracea L.                                           |
| <b>EXTRACTION SOLVENT</b>                                                | Water                                                          |
| <b>E/D RATIO</b>                                                         | 1:25                                                           |
| <b>EXCIPIENT</b>                                                         | Maltodextrin from maize                                        |
| <b>AUXILIARY SUBSTANCE</b>                                               | <=0.5% colloidal anhydrous silica                              |
| <b>PREPARATION TYPE</b>                                                  | Dry extract                                                    |
| <b>PART OF PLANT USED</b>                                                | Leaves                                                         |
| <b>ORIGIN</b>                                                            | Italy                                                          |
| <b>ASPECT</b>                                                            | Powder                                                         |
| <b>COLOUR</b>                                                            | Brownish to greenish                                           |
| <b>TASTE</b>                                                             | Characteristic                                                 |
| <b>ODOR</b>                                                              | Characteristic                                                 |
| <b>IDENTIFICATION</b>                                                    | Complies (met. TLC)                                            |
| <b>PARTICLE SIZE</b>                                                     | >=90% through 35 Mesh (500 micron)                             |
| <b>DENSITY</b>                                                           | 0.5 g/ml ~                                                     |
| <b>LOSS ON DRYING</b>                                                    | <=5%                                                           |
| <b>HEAVY METALS</b>                                                      | <10 ppm<br>Pb <3 ppm; Cd <1 ppm; Hg <0.1 ppm                   |
| <b>RESIDUAL SOLVENTS</b>                                                 | Complies to Directive 2009/32/EC                               |
| <b>PESTICIDES</b>                                                        | Complies to Reg. 2008/839/CE                                   |
| <b>POLYCYCLIC AROMATIC HYDROCARBONS</b>                                  | Conforms to Reg. UE 1933/2015                                  |
| <b>AFLATOXINS</b>                                                        | Aflatoxin B1: <5 ppb<br>Total aflatoxin (B1,B2,G1,G2): <10 ppb |
| <b>BACTERIAL COUNT (TAMC)</b>                                            | <= 5x10000 cfu/g                                               |
| <b>YEAST AND MOUDS (TYMC)</b>                                            | <= 5x10 cfu/g                                                  |
| <b>PATHOGENS</b>                                                         | Salmonella: absent/25g<br>E. Coli: absent/1 g                  |
| <b>ENTEROBACTERIACEE</b>                                                 | <=100 cfu/g                                                    |
| <b>GLUTEN FREE</b>                                                       | Yes                                                            |
| <b>COPY CONFORM TO THE ORIGINAL DOCUMENT – VALID ALTHOUGH NOT SIGNED</b> |                                                                |



via G. Rossetti 19  
20145 Milano (MI)  
Italy

| <b>CERTIFICATO D'ANALISI</b>                                             |                                      |
|--------------------------------------------------------------------------|--------------------------------------|
| CERTIFICATE OF ANALYSIS                                                  |                                      |
| <b>PRODUCT</b>                                                           | <b>DICALCIUM PHOSPHATE 2 HYDRATE</b> |
| <b>LOT.</b>                                                              | C51769A                              |
| <b>APPEARANCE</b>                                                        | White Crystalline Powder             |
| <b>IDENTIFICATION</b>                                                    | Conforms                             |
| <b>ASSAY</b>                                                             | 99.5%                                |
| <b>pH</b>                                                                | 8.0                                  |
| <b>P205</b>                                                              | 43%                                  |
| <b>LOSS ON IGNITION (800°C)</b>                                          | 26.1%                                |
| <b>ALUMINIUM</b>                                                         | Conforms (<200 ppm)                  |
| <b>ARSENIC</b>                                                           | Conforms (<1 ppm)                    |
| <b>LEAD</b>                                                              | Conforms ( 0.15 ppm)                 |
| <b>CADMIUM</b>                                                           | Conforms (<1 ppm)                    |
| <b>IRON</b>                                                              | Conforms (<400 ppm)                  |
| <b>MERCURY</b>                                                           | Conforms (<1 ppm)                    |
| <b>HEAVY METALS (as Pb)</b>                                              | Conforms (<30 ppm)                   |
| <b>BARIUM-TEST</b>                                                       | Conforms                             |
| <b>CHLORIDE</b>                                                          | Conforms (<0.25%)                    |
| <b>FLUORIDE</b>                                                          | Conforms (<50 ppm)                   |
| <b>SULFATE</b>                                                           | Conforms (<0.16%)                    |
| <b>CARBONETE-TEST</b>                                                    | Conforms                             |
| <b>HCl-INSOLUBLE SUBSTANCE</b>                                           | <0.05%                               |
| <b>FILTER TEST</b>                                                       | Conforms                             |
| <b>CONCLUSION</b>                                                        | Product conform to USP/FCC/EP        |
| <b>GMO/BSE/TSE/GLUTEN</b>                                                | Absent                               |
| <b>COPY CONFORM TO THE ORIGINAL DOCUMENT – VALID ALTHOUGH NOT SIGNED</b> |                                      |

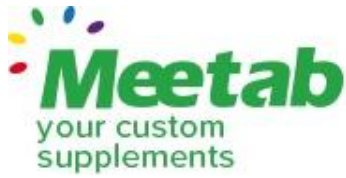

via G. Rossetti 19  
20145 Milano (MI)  
Italy

| <b>CERTIFICATO D'ANALISI</b><br>CERTIFICATE OF ANALYSIS                                                |                                                                   |
|--------------------------------------------------------------------------------------------------------|-------------------------------------------------------------------|
| <b>PRODUCT</b>                                                                                         | <b>SEA MINERAL BLEND (CONTAINING TRACE MINERALS AND ELEMENTS)</b> |
| <b>LOT.</b>                                                                                            | 004-G02                                                           |
| <b>CHLORIDE</b>                                                                                        | 381 mg/g                                                          |
| <b>MAGNESIUM</b>                                                                                       | 128 mg/g                                                          |
| <b>SULFATE</b>                                                                                         | 56.5 mg/g                                                         |
| <b>SODIUM</b>                                                                                          | 15.9 mg/g                                                         |
| <b>POTASSIUM</b>                                                                                       | 22.7 mg/g                                                         |
| <b>LITHIUM</b>                                                                                         | 0.32 mg/g                                                         |
| <b>BORON</b>                                                                                           | 0.090 mg/g                                                        |
| <b>CALCIUM</b>                                                                                         | 0.060 mg/g                                                        |
| <b>This product also contain other naturally occurring trace Minerals found in the Great Salt Lake</b> |                                                                   |
| <b>PERCENT AMBIENT MOISTURE</b>                                                                        | 0.30%                                                             |
| <b>PERCENT TOTAL MOISTURE</b>                                                                          | 7.3%                                                              |
| <b>80 MESH SIZE</b>                                                                                    | 90.8% Weight^                                                     |
| <b>STANDARD PLATE COUNT</b>                                                                            | <1000 cfu/g                                                       |
| <b>TOTAL COLIFORM</b>                                                                                  | <100 cfu/g                                                        |
| <b>ESCHERICHIA COLI</b>                                                                                | Negative                                                          |
| <b>ENTEROBACTERIACEAE</b>                                                                              | Negative                                                          |
| <b>STAPHYLOCOCCUS AUREUS</b>                                                                           | Negative                                                          |
| <b>PSUDOMONAS AERUGINOSA</b>                                                                           | Negative                                                          |
| <b>YEAST &amp; FUNGUS</b>                                                                              | <100 cfu/g                                                        |
| <b>COPY CONFORM TO THE ORIGINAL DOCUMENT – VALID ALTHOUGH NOT SIGNED</b>                               |                                                                   |

| <b>CERTIFICATO D'ANALISI</b><br>CERTIFICATE OF ANALYSIS                  |                                 |
|--------------------------------------------------------------------------|---------------------------------|
| <b>PRODOTTO</b>                                                          | <b>CALCIO CARBONATO PESANTE</b> |
| LOT.                                                                     | 16J14-B04                       |
| <b>IDENTIFICAZIONE A+B</b>                                               | POSITIVE (POSITIVE REACTION)    |
| <b>CONTENUTO CaCO<sub>3</sub></b>                                        | 99.6%                           |
| <b>INSOLUBILE IN ACIDO</b>                                               | <0.2%                           |
| <b>CLORURI</b>                                                           | <330 ppm                        |
| <b>SO<sub>4</sub></b>                                                    | <0.25%                          |
| <b>As</b>                                                                | <3 ppm                          |
| <b>Ba</b>                                                                | CONFORM                         |
| <b>HEAVY METAL</b>                                                       | <20 ppm                         |
| <b>Fe</b>                                                                | <200 ppm                        |
| <b>MG e METALLI ALCALINO-TERROSI</b>                                     | <1%                             |
| <b>LOSS ON DRYING</b>                                                    | <2%                             |
| <b>Pb</b>                                                                | <3 ppm                          |
| <b>Cd</b>                                                                | <1 ppm                          |
| <b>Sb, Cu, Cr, Zn, Ba (E170)</b>                                         | <100 ppm                        |
| <b>F</b>                                                                 | <50 ppm                         |
| <b>Hg</b>                                                                | <0.1 ppm                        |
| <b>OVI</b>                                                               | CONFORM                         |
| <b>COPY CONFORM TO THE ORIGINAL DOCUMENT – VALID ALTHOUGH NOT SIGNED</b> |                                 |



via G. Rossetti 19  
20145 Milano (MI)  
Italy

| <b>CERTIFICATO D'ANALISI</b>                                             |                            |
|--------------------------------------------------------------------------|----------------------------|
| CERTIFICATE OF ANALYSIS                                                  |                            |
| <b>PRODUCT</b>                                                           | <b>L-SELENIOMETHIONINE</b> |
| <b>LOT.</b>                                                              | 2017423                    |
| <b>APPEARANCE</b>                                                        | Fine powder                |
| <b>COLOUR</b>                                                            | White                      |
| <b>ODOR</b>                                                              | Characteristic             |
| <b>IDENTIFICATION</b>                                                    | Conform (IR)               |
| <b>MOISTURE</b>                                                          | Conform                    |
| <b>LEAD</b>                                                              | <0.1 ppm                   |
| <b>CADMIUM</b>                                                           | <0.1 ppm                   |
| <b>MERCURY</b>                                                           | <0.1 ppm                   |
| <b>ARSENIC</b>                                                           | <0.1 ppm                   |
| <b>THROUGH SCREEN 60 MESH</b>                                            | Conform                    |
| <b>TOTAL PLATE COUNT</b>                                                 | <1000 cfu/g                |
| <b>YEAST &amp; MOLD</b>                                                  | < 100 cfu/g                |
| <b>STAPHYLOCOCCUS AUREUS</b>                                             | Negative/g                 |
| <b>E. COLI</b>                                                           | Negative/10 g              |
| <b>SALMONELLA</b>                                                        | Negative/25 g              |
| <b>PSUDOMONAS AERUGINOSA</b>                                             | Negative/g                 |
| <b>SELENIUM CONTENT</b>                                                  | =>5000 ppm                 |
| <b>COPY CONFORM TO THE ORIGINAL DOCUMENT – VALID ALTHOUGH NOT SIGNED</b> |                            |



via G. Rossetti 19  
20145 Milano (MI)  
Italy

| <b>CERTIFICATO D'ANALISI</b><br>CERTIFICATE OF ANALYSIS                  |                         |
|--------------------------------------------------------------------------|-------------------------|
| <b>PRODUCT</b>                                                           | <b>COPPER GLUCONATE</b> |
| <b>LOT.</b>                                                              | 17C10-B12-PPR1711081    |
| <b>IDENTIFICATION</b>                                                    | Conform                 |
| <b>MOISTURE</b>                                                          | Conform                 |
| <b>ASSAY (ON DRY BASIS)</b>                                              | 98.5%                   |
| <b>CHLORIDE</b>                                                          | 0.03%                   |
| <b>SULPHATE</b>                                                          | 0.03%                   |
| <b>ARSENIC</b>                                                           | 1.3 ppm                 |
| <b>LEAD</b>                                                              | <5 ppm                  |
| <b>REDUCING SUBSTANCES</b>                                               | 0.7%                    |
| <b>COPPER CONTENT</b>                                                    | 13.79%                  |
| <b>80 MESH SIZE</b>                                                      | >090%                   |
| <b>TOTAL PLATE COUNT</b>                                                 | 20 cfu/g                |
| <b>YEAST &amp; MOLD</b>                                                  | 10 cfu/g                |
| <b>E. COLI</b>                                                           | Negative/10 g           |
| <b>SALMONELLA</b>                                                        | Negative/25 g           |
| <b>COPY CONFORM TO THE ORIGINAL DOCUMENT – VALID ALTHOUGH NOT SIGNED</b> |                         |



via G. Rossetti 19  
20145 Milano (MI)  
Italy

| <b>CERTIFICATO D'ANALISI</b>                                             |                           |
|--------------------------------------------------------------------------|---------------------------|
| CERTIFICATE OF ANALYSIS                                                  |                           |
| <b>PRODUCT</b>                                                           | <b>BITARTRATE CHOLINE</b> |
| <b>LOT.</b>                                                              | 3012864                   |
| <b>APPEARANCE</b>                                                        | WHITE CRYSTALLINE POWDER  |
| <b>IDENTIFICATION</b>                                                    | COMPLIES (IR, B)          |
| <b>SPECIFIC ROTATION</b>                                                 | +17.9°                    |
| <b>pH (10%)</b>                                                          | 3.4                       |
| <b>WATER</b>                                                             | 0.07%                     |
| <b>RESIDUE ON IGNITION</b>                                               | <0.1%                     |
| <b>AS</b>                                                                | <2 ppm                    |
| <b>LEAD</b>                                                              | <0.3 ppm                  |
| <b>TOTAL AMINES</b>                                                      | 4.1 ppm                   |
| <b>CROMATOGRAPHIC PURITY</b>                                             | Conforms                  |
| <b>O.V.I.</b>                                                            | Conforms                  |
| <b>1.4 DIOXANE</b>                                                       | Conforms                  |
| <b>HEAVY METAL</b>                                                       | <10 ppm                   |
| <b>ASSAY (anhydrous basis)</b>                                           | 99.52%                    |
| <b>TOTAL AEROBIC COUNT</b>                                               | <1000 cfu/g               |
| <b>YEAST &amp; MOLD</b>                                                  | <100 cfu/g                |
| <b>E. COLI</b>                                                           | Negative/10 g             |
| <b>SALMONELLA</b>                                                        | Negative/25 g             |
| <b>CONFORM</b>                                                           | USP/DAB                   |
| <b>COPY CONFORM TO THE ORIGINAL DOCUMENT – VALID ALTHOUGH NOT SIGNED</b> |                           |



via G. Rossetti 19  
20145 Milano (MI)  
Italy

| <b>CERTIFICATO D'ANALISI</b>                                             |                                              |
|--------------------------------------------------------------------------|----------------------------------------------|
| CERTIFICATE OF ANALYSIS                                                  |                                              |
| <b>PRODUCT</b>                                                           | <b>INOSITOL</b>                              |
| <b>LOT.</b>                                                              | HZ-IN1702065                                 |
| <b>APPEARANCE</b>                                                        | WHITE CRYSTALLINE POWDER                     |
| <b>IDENTIFICATION</b>                                                    | Positive reaction (A,B)                      |
| <b>MELTING POINT</b>                                                     | 225.3-226.4°C                                |
| <b>LOSS ON DRYING</b>                                                    | 0.02%                                        |
| <b>RESIDUE ON IGNITION</b>                                               | 0.02%                                        |
| <b>CLARITY/COLOR OF SOLUTION</b>                                         | meet the requirement                         |
| <b>CHLORIDE</b>                                                          | <0.005%                                      |
| <b>SULFATE</b>                                                           | <0.006%                                      |
| <b>CALCIUM</b>                                                           | meet the requirement                         |
| <b>HEAVY METALS</b>                                                      | <5 ppm                                       |
| <b>LEAD</b>                                                              | <0.5 ppm                                     |
| <b>ARSENIC</b>                                                           | <0.5 ppm                                     |
| <b>CADMIUM</b>                                                           | <0.5 ppm                                     |
| <b>MERCURY</b>                                                           | <0.1 ppm                                     |
| <b>TOTAL PLATE COUNT</b>                                                 | <10 cfu/g                                    |
| <b>YEAST &amp; MOLD</b>                                                  | <10 cfu/g                                    |
| <b>E. COLI</b>                                                           | Negative/10 g                                |
| <b>SALMONELLA</b>                                                        | Negative/25 g                                |
| <b>ASSAY</b>                                                             | 98.59%                                       |
| <b>CONCLUSION</b>                                                        | The good are complied with FCCVIX/USP38/NF33 |
| <b>COPY CONFORM TO THE ORIGINAL DOCUMENT – VALID ALTHOUGH NOT SIGNED</b> |                                              |





via G. Rossetti 19  
20145 Milano (MI)  
Italy

| <b>CERTIFICATO D'ANALISI</b><br>CERTIFICATE OF ANALYSIS                  |                                               |
|--------------------------------------------------------------------------|-----------------------------------------------|
| <b>PRODUCT</b>                                                           | <b>PARA-AMINOBENZOIC ACID</b>                 |
| <b>LOT.</b>                                                              | 17E15-B09                                     |
| <b>APPEARANCE</b>                                                        | WHITE CRYSTALLINE POWDER                      |
| <b>IDENTIFICATION</b>                                                    | Conforms                                      |
| <b>PARTICLE SIZE (MESH)</b>                                              | Conforms                                      |
| <b>ASSAY (ON DRIED BASIS)</b>                                            | 99.75%                                        |
| <b>RESIDUE ON IGNITION</b>                                               | 0.01%                                         |
| <b>LOSS ON DRYING</b>                                                    | 0.08%                                         |
| <b>HUMIDITY</b>                                                          | 1.1%                                          |
| <b>HEAVY METALS</b>                                                      | <20 ppm                                       |
| <b>TOTAL PLATE COUNT</b>                                                 | <1000 cfu/g                                   |
| <b>MERCURY</b>                                                           | <0.1 ppm                                      |
| <b>CADMIUM</b>                                                           | <1 ppm                                        |
| <b>YEAST &amp; MOLD</b>                                                  | <100 cfu/g                                    |
| <b>E. COLI</b>                                                           | Negative/1g                                   |
| <b>SALMONELLA</b>                                                        | Negative/25g                                  |
| <b>CHEMICAL FORMULA</b>                                                  | C <sub>7</sub> H <sub>7</sub> N <sub>02</sub> |
| <b>COPY CONFORM TO THE ORIGINAL DOCUMENT – VALID ALTHOUGH NOT SIGNED</b> |                                               |

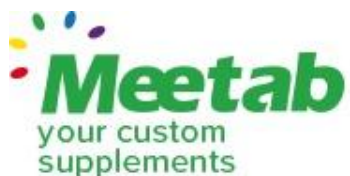

via G. Rossetti 19  
20145 Milano (MI)  
Italy

| <b>CERTIFICATO D'ANALISI</b>                                             |                                              |
|--------------------------------------------------------------------------|----------------------------------------------|
| CERTIFICATE OF ANALYSIS                                                  |                                              |
| <b>PRODUCT</b>                                                           | <b>SODIUM MOLYBDATE 10% ON MALTODEXTRINE</b> |
| <b>LOT.</b>                                                              | 0000811963                                   |
| <b>MOLYBDENUM (%)</b>                                                    | 4%                                           |
| <b>LOSS ON DRYING (2h – 105°C)</b>                                       | 4.2%                                         |
| <b>APPEARANCE</b>                                                        | WHITE CRYSTALLINE POWDER                     |
| <b>HEAVY METALS</b>                                                      | Conforms                                     |
| <b>TOTAL AEROBIC COUNT 30°C max 1000/g</b>                               | Conforms                                     |
| <b>MOULD max 100/g</b>                                                   | Conforms                                     |
| <b>YEAST max 100/g</b>                                                   | Conforms                                     |
| <b>COLIFORM GERMS/ENTEROBACTERIACEAE/10g</b>                             | Negative                                     |
| <b>E. COLI/10 g</b>                                                      | Negative                                     |
| <b>SALMONELLA SPECIES/100 g</b>                                          | Negative                                     |
| <b>COPY CONFORM TO THE ORIGINAL DOCUMENT – VALID ALTHOUGH NOT SIGNED</b> |                                              |



via G. Rossetti 19  
20145 Milano (MI)  
Italy

| <b>CERTIFICATO D'ANALISI</b><br>CERTIFICATE OF ANALYSIS                  |                                                                 |
|--------------------------------------------------------------------------|-----------------------------------------------------------------|
| <b>PRODUCT</b>                                                           | <b>CHROMIUM PICOLINATE</b>                                      |
| <b>LOT.</b>                                                              | 17J05-B26-PPR1804210                                            |
| <b>APPEARANCE</b>                                                        | RED-VIOLET CRYSTALLINE POWDER                                   |
| <b>IDENTIFICATION</b>                                                    | Conforms                                                        |
| <b>PARTICLE SIZE (MESH)</b>                                              | Conforms                                                        |
| <b>pH</b>                                                                | 6.2                                                             |
| <b>BULK DENSITY</b>                                                      | 0.65 g/ml                                                       |
| <b>ASSAY (ON DRIED BASIS)</b>                                            | 99.2%                                                           |
| <b>CHLORIDE</b>                                                          | 0.002%                                                          |
| <b>SULFATE</b>                                                           | 0.03%                                                           |
| <b>HUMIDITY</b>                                                          | 1.1%                                                            |
| <b>HEAVY METALS</b>                                                      | <10 ppm                                                         |
| <b>LEAD</b>                                                              | <3 ppm                                                          |
| <b>ARSENIC</b>                                                           | <5 ppm                                                          |
| <b>MERCURY</b>                                                           | <0.1 ppm                                                        |
| <b>CADMIUM</b>                                                           | <1 ppm                                                          |
| <b>TOTAL PLATE COUNT</b>                                                 | <1000 cfu/g                                                     |
| <b>YEAST &amp; MOLD</b>                                                  | <100 cfu/g                                                      |
| <b>E. COLI</b>                                                           | Negative/1g                                                     |
| <b>SALMONELLA</b>                                                        | Negative/1g                                                     |
| <b>CHEMICAL FORMULA</b>                                                  | Cr(C <sub>6</sub> H <sub>4</sub> NO <sub>2</sub> ) <sub>3</sub> |
| <b>CHROMIUM CONTENT</b>                                                  | 12.29%                                                          |
| <b>COPY CONFORM TO THE ORIGINAL DOCUMENT – VALID ALTHOUGH NOT SIGNED</b> |                                                                 |

## FORMULA MY ANTIOXIDANT

| <b>Analysis for 4 tablets</b> | <b>mg</b> |
|-------------------------------|-----------|
| Vitamin C                     | 640       |
| Green Tea dry extract         | 500       |
| L-Lysine                      | 500       |
| Alpha Lipoic Acid             | 150       |
| Quercetin                     | 150       |
| L-Glutamine                   | 100       |
| L-Methionine                  | 100       |
| L-Proline                     | 100       |
| L-Arginine                    | 100       |
| N-Acetil L-Cisteina           | 100       |
| Broccoli extract              | 100       |
| Fruit Extract                 | 100       |
| Vitamin E                     | 60        |
| Prunus cerasus e.s.           | 50        |
| Bioflavonoids from citrus     | 50        |
| Resveratrol                   | 50        |
| L-Glycine                     | 50        |
| Vitamin B3                    | 35        |
| (of which Nicotinamide)       | 30        |
| (of which Nicotinic Acid)     | 5         |
| Vitamin B1                    | 25        |
| Acerola                       | 20        |
| Bromelain                     | 10        |
| Lutein                        | 10        |
| Picogenolo                    | 10        |
| Vitamin B6                    | 9         |
| Beta Carotene                 | 7         |
| Vitamin B5                    | 5         |
| Choline Bitartrate            | 5         |
| Inositol                      | 5         |
| PABA                          | 5         |
| Vitamin B2                    | 4,8       |
| Astaxanthin                   | 4         |
| Vitamin B12                   | 0,033     |
| Biotin                        | 0,2       |
| Methylfolate (Folic Acid)     | 0,1       |
| Vitamin D3                    | 0,025     |

| <b>CERTIFICATO D'ANALISI</b><br>CERTIFICATE OF ANALYSIS                  |                                                     |
|--------------------------------------------------------------------------|-----------------------------------------------------|
| <b>PRODOTTO</b>                                                          | <b>VITAMINA C ACIDO L-ASCORBICO USP/BP/FCC/E300</b> |
| <b>LOT.</b>                                                              | 201701116                                           |
| <b>DESCRIPTION</b>                                                       | WHITE ALMOST WHITE CRYSTALS – CRYSTALLINE POWDER    |
| <b>IDENTIFICATION</b>                                                    | POSITIVE (POSITIVE REACTION)                        |
| <b>MELTING POINT</b>                                                     | CONFORM (ABOUT 190°C)                               |
| <b>PH</b>                                                                | 2.37                                                |
| <b>SPECIFIC ROTATION</b>                                                 | 21.04°                                              |
| <b>CLARITY OF SOLUTION</b>                                               | CLEAR                                               |
| <b>COLOR OF SOLUTION</b>                                                 | < BY7                                               |
| <b>COPPER</b>                                                            | <5 ppm                                              |
| <b>HEAVY METALS</b>                                                      | <10 ppm                                             |
| <b>MERCURY</b>                                                           | <0.1 mg/kg                                          |
| <b>LEAD</b>                                                              | <2 mg/kg                                            |
| <b>ARSENIC</b>                                                           | <3 ppm                                              |
| <b>CADMIUM</b>                                                           | <1 mg/kg                                            |
| <b>OXALIC ACID</b>                                                       | <0.2%                                               |
| <b>IRON</b>                                                              | <2 ppm                                              |
| <b>LOSS ON DRYING</b>                                                    | < 0.0%                                              |
| <b>SULPHATE ASH</b>                                                      | <0.1%                                               |
| <b>ORGANIC VOLATILE IMPURITIES</b>                                       | PASS                                                |
| <b>MESH</b>                                                              | PASS                                                |
| <b>ASSAY</b>                                                             | 99.75%                                              |
| <b>TOTAL PLATE COUNT</b>                                                 | <10 cfu/g                                           |
| <b>YEAST AND MOLDS</b>                                                   | <10 cfu/g                                           |
| <b>E.COLI</b>                                                            | Absence/1 g                                         |
| <b>SALMONELLA</b>                                                        | Absence/25 g                                        |
| <b>COPY CONFORM TO THE ORIGINAL DOCUMENT – VALID ALTHOUGH NOT SIGNED</b> |                                                     |

| <b>CERTIFICATO D'ANALISI</b><br>CERTIFICATE OF ANALYSIS                  |                                                         |
|--------------------------------------------------------------------------|---------------------------------------------------------|
| <b>PRODOTTO</b>                                                          | <b>D-alpha tocopheryl acetate Vit E NAT</b>             |
| <b>LOT.</b>                                                              | S20160701                                               |
| <b>DESCRIPTION</b>                                                       | Almost white, yellowish or light brown, small particles |
| <b>IDENTIFICATION</b>                                                    | POSITIVE (POSITIVE REACTION)                            |
| <b>ASSAY</b>                                                             | 703 IU                                                  |
| <b>LOSS ON DRYING</b>                                                    | 2.46%                                                   |
| <b>BULK DENSITY</b>                                                      | 0.480 g/cm <sup>3</sup>                                 |
| <b>PARTICLE SIZE</b>                                                     | Residue on 40 meshes =/< 1% CONFORM                     |
| <b>BENZO(A)PYRENE</b>                                                    | <2 ppb                                                  |
| <b>HEAVY METALS (as Pb)</b>                                              | <10 ppm                                                 |
| <b>MERCURY</b>                                                           | <0.1 mg/kg                                              |
| <b>LEAD</b>                                                              | <2 mg/kg                                                |
| <b>ARSENIC</b>                                                           | <1 mg/kg                                                |
| <b>CADMIUM</b>                                                           | <1 mg/kg                                                |
| <b>TOTAL BACTERIAL COUNT</b>                                             | <1000 cfu/g CONFORM                                     |
| <b>YEAST AND MOLDS</b>                                                   | <100 cfu/g CONFORM                                      |
| <b>COLIFORM</b>                                                          | <0.3 MNP/g NEGATIVE                                     |
| <b>SALMONELLA</b>                                                        | Negative/25 g                                           |
| <b>STAPHYLOCOCCUS AUREUS</b>                                             | Negative/1 g                                            |
| <b>COPY CONFORM TO THE ORIGINAL DOCUMENT – VALID ALTHOUGH NOT SIGNED</b> |                                                         |

| <b>CERTIFICATO D'ANALISI</b><br>CERTIFICATE OF ANALYSIS                  |                                                             |
|--------------------------------------------------------------------------|-------------------------------------------------------------|
| <b>PRODOTTO</b>                                                          | <b>NATURAL SOURCE VITAMIN E (MIXED NATURAL TOCOPHEROLS)</b> |
| <b>LOT.</b>                                                              | T(13590-0399)TPA                                            |
| <b>APPEARANCE</b>                                                        | Clear, white to cream fine powder                           |
| <b>TASTE</b>                                                             | Bland, characteristic                                       |
| <b>ODOUR</b>                                                             | Bland to none                                               |
| <b>TOCOPHEROLS CONTENT</b>                                               | min. 335 mg/g mixed tocopherols                             |
| <b>SPECIFIC GRAVITY/DENSITY (25°C)</b>                                   | 0.58 g/cm <sup>3</sup>                                      |
| <b>ACIDITY (as mixed tocopherols)</b>                                    | <0.35 ml KOH 0.1N/f                                         |
| <b>LOSS ON DRYING</b>                                                    | <5%                                                         |
| <b>BENZO(A)PYRENE</b>                                                    | <2 ppb                                                      |
| <b>HEAVY METALS (for mixed tocopherols)</b>                              |                                                             |
| <b>MERCURY</b>                                                           | <0.1 ppm                                                    |
| <b>LEAD</b>                                                              | <0.1 ppm                                                    |
| <b>ARSENIC</b>                                                           | <1 ppm                                                      |
| <b>CADMIUM</b>                                                           | < 1 ppm                                                     |
| <b>TOTAL AEROBIC COUNT</b>                                               | <1000 cfu/g CONFORM                                         |
| <b>YEAST AND MOLDS</b>                                                   | <100 cfu/g CONFORM                                          |
| <b>E. COLI</b>                                                           | Negative cfu/g                                              |
| <b>SALMONELLA</b>                                                        | Negative/25 g                                               |
| <b>STAPHYLOCOCCUS AUREUS</b>                                             | Negative/1 g                                                |
| <b>COPY CONFORM TO THE ORIGINAL DOCUMENT – VALID ALTHOUGH NOT SIGNED</b> |                                                             |



via G. Rossetti 19  
20145 Milano (MI)  
Italy

| <b>CERTIFICATO D'ANALISI</b>                                             |                                                   |
|--------------------------------------------------------------------------|---------------------------------------------------|
| CERTIFICATE OF ANALYSIS                                                  |                                                   |
| <b>PRODUCT</b>                                                           | <b>VITAMIN PP -NICOTINAMIDE</b>                   |
| <b>LOT.</b>                                                              | OP11708013                                        |
| <b>APPEARANCE</b>                                                        | Crystalline Powder                                |
| <b>COLOUR</b>                                                            | White                                             |
| <b>IDENTIFICATION (IR,USP,EP,JP)</b>                                     | Conforms                                          |
| <b>CLARITY OF SOLUTION (5 g in 100 ml water)</b>                         | 0.17                                              |
| <b>pH (sol. 5 g in 100 ml water)</b>                                     | 6.4                                               |
| <b>LOSS ON DRYING (EP)</b>                                               | 0.0% w/w                                          |
| <b>MELTING RANGE (START/END)</b>                                         | 128.7-129.1°C                                     |
| <b>PARTICLE SIZE FRACTION</b>                                            | >50 micron 100% (=>90%)<br>> 250 micron 0% (<=8%) |
| <b>SULFATE ASH</b>                                                       | <0.05%                                            |
| <b>CHLORIDE</b>                                                          | <70 mg/Kg                                         |
| <b>SULFATE</b>                                                           | <190 mg/kg                                        |
| <b>HEAVY METALS</b>                                                      | <20 mg/Kg                                         |
| <b>ASSAY (HPLC)</b>                                                      | 99.8%                                             |
| <b>CONFORM TO CURRENT REQUIR OF EP,USP,FCC</b>                           | Conforms                                          |
| <b>TOTAL PLATE COUNT</b>                                                 | Conforms                                          |
| <b>YEAST &amp; MOLD</b>                                                  | Conforms                                          |
| <b>E. COLI</b>                                                           | Negative                                          |
| <b>SALMONELLA</b>                                                        | Negative                                          |
| <b>COPY CONFORM TO THE ORIGINAL DOCUMENT – VALID ALTHOUGH NOT SIGNED</b> |                                                   |



| <b>CERTIFICATO D'ANALISI</b><br>CERTIFICATE OF ANALYSIS                  |                                                                                                                                                         |
|--------------------------------------------------------------------------|---------------------------------------------------------------------------------------------------------------------------------------------------------|
| <b>PRODUCT</b>                                                           | <b>NICOTINIC ACID</b>                                                                                                                                   |
| <b>LOT.</b>                                                              | 16-17/NCN[P]/B/093                                                                                                                                      |
| <b>APPEARANCE</b>                                                        | White cristalline powder                                                                                                                                |
| <b>SOLUBILITY</b>                                                        | Sparingly soluble in water, soluble in boiling water and in boiling ethanol (96%) and in dilute solution of alkali hydroxides and carbonates – Complies |
| <b>MELTING POINT</b>                                                     | 237°C                                                                                                                                                   |
| <b>IR TEST</b>                                                           | Matches                                                                                                                                                 |
| <b>RELATED SUBSTANCE</b>                                                 | Complies                                                                                                                                                |
| <b>HEAVY METAL</b>                                                       | <20 ppm                                                                                                                                                 |
| <b>LOSS ON DRYING</b>                                                    | 0.23% w/w                                                                                                                                               |
| <b>SULPHATED ASH/RESIDUE ON IGNITION</b>                                 | 0.027% w/w                                                                                                                                              |
| <b>CHLORIDE</b>                                                          | <200ppm                                                                                                                                                 |
| <b>SULPHATE</b>                                                          | N.A.                                                                                                                                                    |
| <b>ASSAY</b>                                                             | 99.75% w/w                                                                                                                                              |
| <b>LEAD</b>                                                              | Less than 3mg/kg                                                                                                                                        |
| <b>ARSENIC</b>                                                           | Less than 1mg/kg                                                                                                                                        |
| <b>CADMIUM</b>                                                           | Less than 1mg/kg                                                                                                                                        |
| <b>MERCURY</b>                                                           | Less than 0.1mg/kg                                                                                                                                      |
| <b>TOTAL PLATE COUNT</b>                                                 | <30 cfu/g                                                                                                                                               |
| <b>YEAST &amp; MOLD</b>                                                  | < 10 cfu/g                                                                                                                                              |
| <b>STAPHYLOCOCCUS AUREUS</b>                                             | Negative                                                                                                                                                |
| <b>E. COLI</b>                                                           | Negative                                                                                                                                                |
| <b>SALMONELLA</b>                                                        | Negative                                                                                                                                                |
| <b>COPY CONFORM TO THE ORIGINAL DOCUMENT – VALID ALTHOUGH NOT SIGNED</b> |                                                                                                                                                         |



via G. Rossetti 19  
20145 Milano (MI)  
Italy

| <b>CERTIFICATO D'ANALISI</b><br>CERTIFICATE OF ANALYSIS                  |                                |
|--------------------------------------------------------------------------|--------------------------------|
| <b>PRODUCT</b>                                                           | <b>VITAMIN B1 HCl (TIAMIN)</b> |
| <b>LOT.</b>                                                              | Y01201610005                   |
| <b>APPEARANCE</b>                                                        | White cristalline powder       |
| <b>IDENTIFICATION</b>                                                    | Conforms                       |
| <b>ASPECT</b>                                                            | Conforms                       |
| <b>pH</b>                                                                | 3.0                            |
| <b>SULPHATE</b>                                                          | <300 ppm                       |
| <b>NITRATE (ppm)</b>                                                     | Conforms                       |
| <b>HEAVY METAL</b>                                                       | <10 ppm                        |
| <b>LEAD</b>                                                              | <2 ppm                         |
| <b>ARSENIC</b>                                                           | < 3 ppm                        |
| <b>CADMIUM</b>                                                           | <1 ppm                         |
| <b>MERCURY</b>                                                           | <1 ppm                         |
| <b>ASSAY</b>                                                             | 100%                           |
| <b>TOTAL PLATE COUNT</b>                                                 | <1000 cfu/g                    |
| <b>YEAST &amp; MOLD</b>                                                  | < 100 cfu/g                    |
| <b>STAPHYLOCOCCUS AUREUS</b>                                             | Negative                       |
| <b>E. COLI</b>                                                           | Negative                       |
| <b>SALMONELLA</b>                                                        | Negative                       |
| <b>CONCLUSION</b>                                                        | Product conform to EP-USP, FCC |
| <b>COPY CONFORM TO THE ORIGINAL DOCUMENT – VALID ALTHOUGH NOT SIGNED</b> |                                |

| <b>CERTIFICATO D'ANALISI</b>                                             |                                     |
|--------------------------------------------------------------------------|-------------------------------------|
| CERTIFICATE OF ANALYSIS                                                  |                                     |
| <b>PRODUCT</b>                                                           | <b>PYRIDOXAL 5-PHOSPHATE</b>        |
| <b>LOT.</b>                                                              | C041612804                          |
| <b>DESCRIPTION</b>                                                       | SLIGHTLY YELLOW OR OFF-WHITE POWDER |
| <b>IDENTIFICATION</b>                                                    | Conforms                            |
| <b>SOLUBILITY</b>                                                        | Conforms                            |
| <b>MELTING POINT</b>                                                     | 142°C                               |
| <b>WATER by KF</b>                                                       | 8.3%                                |
| <b>HEAVY METALS</b>                                                      | <10 ppm                             |
| <b>LEAD</b>                                                              | <1 ppm                              |
| <b>ARSENIC</b>                                                           | <1 ppm                              |
| <b>MERCURY</b>                                                           | <0.1 ppm                            |
| <b>CADMIUM</b>                                                           | <1 ppm                              |
| <b>pH (in 0.25% water)</b>                                               | 2.7                                 |
| <b>PARTICLE SIZE (MESH)</b>                                              | Conforms                            |
| <b>BULK DENSITY</b>                                                      | 0.37 ml                             |
| <b>TAPPED DENSITY</b>                                                    | 0.64 g/ml                           |
| <b>ASSAY (ON DRIED BASIS)</b>                                            | 99.2%                               |
| <b>RESIDUAL SOLVENT</b>                                                  | Conforms                            |
| <b>TOLENE</b>                                                            | Conforms                            |
| <b>TOTAL PLATE COUNT</b>                                                 | <100 cfu/g                          |
| <b>YEAST &amp; MOLD</b>                                                  | <10 cfu/g                           |
| <b>E. COLI</b>                                                           | Negative                            |
| <b>SALMONELLA</b>                                                        | Negative                            |
| <b>COLIFORMS</b>                                                         | Negative                            |
| <b>COPY CONFORM TO THE ORIGINAL DOCUMENT – VALID ALTHOUGH NOT SIGNED</b> |                                     |



via G. Rossetti 19  
20145 Milano (MI)  
Italy

| <b>CERTIFICATO D'ANALISI</b><br>CERTIFICATE OF ANALYSIS                  |                                |
|--------------------------------------------------------------------------|--------------------------------|
| <b>PRODOTTO</b>                                                          | <b>BETACAROTENE</b>            |
| <b>LOT.</b>                                                              | 6091711003                     |
| <b>APPEARANCE</b>                                                        | Cristalline Fine powder        |
| <b>COLOR</b>                                                             | Brown/Red                      |
| <b>ODOUR</b>                                                             | Bland                          |
| <b>MELTING POINT</b>                                                     | 177-179°C                      |
| <b>RESIDUAL SOLVENT</b>                                                  | Conforms                       |
| <b>IDENTIFICATION (BETACAROTENE)</b>                                     | CONFORM                        |
| <b>IDENTIFICATION (IR)</b>                                               | CONFORM                        |
| <b>LOSS ON DRYING</b>                                                    | 0.01%                          |
| <b>HEAVY METALS</b>                                                      | <10 ppm CONFORM                |
| <b>MERCURY</b>                                                           | <0.1 ppm CONFORM               |
| <b>LEAD</b>                                                              | <2 ppm CONFORM                 |
| <b>ARSENIC</b>                                                           | <1 ppm CONFORM                 |
| <b>CADMIUM</b>                                                           | < 1 ppm CONFORM                |
| <b>TOTAL AEROBIC COUNT</b>                                               | <1000 cfu/g CONFORM (80 UFC/g) |
| <b>YEAST AND MOLDS</b>                                                   | <100 cfu/g CONFORM (<10 UFC/g) |
| <b>E. COLI</b>                                                           | Negative cfu/g                 |
| <b>SALMONELLA</b>                                                        | Negative/25 g                  |
| <b>TITTLE</b>                                                            | 99.5% BETACAROTENE             |
| <b>COPY CONFORM TO THE ORIGINAL DOCUMENT – VALID ALTHOUGH NOT SIGNED</b> |                                |



via G. Rossetti 19  
20145 Milano (MI)  
Italy

| <b>CERTIFICATO D'ANALISI</b>                                             |                                                      |
|--------------------------------------------------------------------------|------------------------------------------------------|
| CERTIFICATE OF ANALYSIS                                                  |                                                      |
| <b>PRODUCT</b>                                                           | <b>HYDROXOCOBALAMINE ACETATE – VIT. B12</b>          |
| <b>LOT.</b>                                                              | A17243E                                              |
| <b>APPEARANCE</b>                                                        | Crystalline powder or dark red crystals              |
| <b>IDENTIFICATION</b>                                                    | Conforms                                             |
| <b>A525/A531</b>                                                         | 0.33                                                 |
| <b>A274/A351</b>                                                         | 0.8                                                  |
| <b>pH</b>                                                                | 6.0                                                  |
| <b>LOSS ON WEIGHT</b>                                                    | 11.1%                                                |
| <b>SUM OF IMPURITY</b>                                                   | <5.0%                                                |
| <b>SPECTRUMPHOTOMETRIC ASSAY</b>                                         | 97.5% sps                                            |
| <b>ACETONE (GC)</b>                                                      | 738 ppm                                              |
| <b>METHANOL (GC)</b>                                                     | <1000 ppm                                            |
| <b>HEAVY METALS</b>                                                      | Conforms                                             |
| <b>TOTAL PLATE COUNT</b>                                                 | <1000 cfu/g                                          |
| <b>YEAST &amp; MOLD</b>                                                  | <100 cfu/g                                           |
| <b>E. COLI</b>                                                           | Negative                                             |
| <b>SALMONELLA</b>                                                        | Negative                                             |
| <b>BACTERIAN ENDOTOXINE</b>                                              | <=0.4 Complies                                       |
| <b>CONCLUSION</b>                                                        | This product meets with the specification of Ph. Eur |
| <b>COPY CONFORM TO THE ORIGINAL DOCUMENT – VALID ALTHOUGH NOT SIGNED</b> |                                                      |



via G. Rossetti 19  
20145 Milano (MI)  
Italy

| <b>CERTIFICATO D'ANALISI</b>                                             |                                            |
|--------------------------------------------------------------------------|--------------------------------------------|
| CERTIFICATE OF ANALYSIS                                                  |                                            |
| <b>PRODUCT</b>                                                           | <b>VITAMIN B5 (D-CALCIUM PANTOTHENATE)</b> |
| <b>LOT.</b>                                                              | 16061404                                   |
| <b>APPEARANCE</b>                                                        | WHITE OR ALMOST WHITE POWDER               |
| <b>INFRARED ABSORBATION</b>                                              | Up to standard figure                      |
| <b>IDENTIFICATION OF CALCIUM ION</b>                                     | Normal reaction                            |
| <b>pH VALUE</b>                                                          | Conform (6.8-8.0)                          |
| <b>ALKALINITY</b>                                                        | Conform                                    |
| <b>SPECIFIC ROTATION</b>                                                 | +26.8°C                                    |
| <b>LEAD</b>                                                              | <3 ppm                                     |
| <b>ARSENIC</b>                                                           | <1 ppm                                     |
| <b>CADMIUM</b>                                                           | <1 ppm                                     |
| <b>MERCURY</b>                                                           | <0.1 ppm                                   |
| <b>IMPURITY CONTENT</b>                                                  | Conform <1%                                |
| <b>HEAVY METALS</b>                                                      | <=0.002%                                   |
| <b>NITROGEN CONTENT</b>                                                  | 5.8%                                       |
| <b>CALCIUM CONTENT</b>                                                   | 8.3%                                       |
| <b>LOSS ON DRYING</b>                                                    | 2.2%                                       |
| <b>RESIDUAL SOLVENT</b>                                                  | 0.11%                                      |
| <b>TOTAL PLATE COUNT</b>                                                 | <1000 cfu/g                                |
| <b>YEAST &amp; MOLD</b>                                                  | <100 cfu/g                                 |
| <b>E. COLI</b>                                                           | Negative/10 g                              |
| <b>SALMONELLA</b>                                                        | Negative/25 g                              |
| <b>ASSAY</b>                                                             | 99.2%                                      |
| <b>CONCLUSION</b>                                                        | Complies with USP39                        |
| <b>COPY CONFORM TO THE ORIGINAL DOCUMENT – VALID ALTHOUGH NOT SIGNED</b> |                                            |

| <b>CERTIFICATO D'ANALISI</b>                                             |                                |
|--------------------------------------------------------------------------|--------------------------------|
| CERTIFICATE OF ANALYSIS                                                  |                                |
| <b>PRODUCT</b>                                                           | <b>VITAMIN B2 (Riboflavin)</b> |
| <b>LOT.</b>                                                              | 17D10-B11-PPR1717485           |
| <b>APPEARANCE</b>                                                        | YELLOW- ORANGE POWDER          |
| <b>IDENTIFICATION</b>                                                    | Conforms                       |
| <b>SPECIFIC ROTATION</b>                                                 | Conforms                       |
| <b>ABSORBANCE (Ph. Eur.)</b>                                             | Conforms                       |
| <b>LUMIFLAVIN (USP)</b>                                                  | 0.0052                         |
| <b>SULPHUR ASH</b>                                                       | 0.08/100 g                     |
| <b>RESIDUE ON IGNITION</b>                                               | 0.08%                          |
| <b>LOSS ON DRYING</b>                                                    | 1.0g/100g                      |
| <b>ASSAY</b>                                                             | 99.9%                          |
| <b>HEAVY METALS</b>                                                      | <10 ppm                        |
| <b>LEAD</b>                                                              | <2 ppm                         |
| <b>ARSENIC</b>                                                           | <1 ppm                         |
| <b>CADMIUM</b>                                                           | <1 ppm                         |
| <b>MERCURY</b>                                                           | <0.1 ppm                       |
| <b>TOTAL PLATE COUNT</b>                                                 | <1000 cfu/g                    |
| <b>YEAST &amp; MOLD</b>                                                  | <100 cfu/g                     |
| <b>E. COLI</b>                                                           | Negative/10 g                  |
| <b>SALMONELLA</b>                                                        | Negative/25 g                  |
| <b>PSUDOMONAS AERUGINOSA</b>                                             | Negative/g                     |
| <b>STAPHYLOCOCCUS AUREUS</b>                                             | Negative/g                     |
| <b>COPY CONFORM TO THE ORIGINAL DOCUMENT – VALID ALTHOUGH NOT SIGNED</b> |                                |



via G. Rossetti 19  
20145 Milano (MI)  
Italy

| <b>CERTIFICATO D'ANALISI</b><br>CERTIFICATE OF ANALYSIS                  |                                     |
|--------------------------------------------------------------------------|-------------------------------------|
| <b>PRODUCT</b>                                                           | <b>VITAMIN D3 100000 IU/g</b>       |
| <b>LOT.</b>                                                              | 5431-1712001                        |
| <b>APPEARANCE</b>                                                        | White to off White/Yellowish Powder |
| <b>IDENTIFICATION</b>                                                    | Conforms                            |
| <b>ASSAY</b>                                                             | Min. 100000 IU/g                    |
| <b>SIEVE ANALYSIS</b>                                                    | 100% Pass 40 Mesh Conforms          |
| <b>LOSS ON DRYING</b>                                                    | 3.91%                               |
| <b>ARSENIC</b>                                                           | Conforms (<0.5 ppm)                 |
| <b>LEAD</b>                                                              | Conforms ( 0.5 ppm)                 |
| <b>CADMIUM</b>                                                           | Conforms (<0.1 ppm)                 |
| <b>MERCURY</b>                                                           | Conforms (<0.1 ppm)                 |
| <b>TOTAL PLATE COUNT</b>                                                 | 10 cfu/g (<1000 cfu/g)              |
| <b>YEAST &amp; MOLD</b>                                                  | 10 cfu/g (<100 cfu/g)               |
| <b>E. COLI</b>                                                           | Negative                            |
| <b>SALMONELLA</b>                                                        | Negative                            |
| <b>STAPHYLOCOCCUS AUREUS</b>                                             | Negative                            |
| <b>COLIFORMS</b>                                                         | Negative                            |
| <b>GMO/BSE/TSE/GLUTEN</b>                                                | Absent                              |
| <b>COPY CONFORM TO THE ORIGINAL DOCUMENT – VALID ALTHOUGH NOT SIGNED</b> |                                     |





via G. Rossetti 19  
20145 Milano (MI)  
Italy

| <b>CERTIFICATO D'ANALISI</b><br>CERTIFICATE OF ANALYSIS                  |                                       |
|--------------------------------------------------------------------------|---------------------------------------|
| <b>PRODUCT</b>                                                           | <b>D-BIOTIN (VIT H)</b>               |
|                                                                          |                                       |
| <b>LOT.</b>                                                              | VH20160702C                           |
| <b>APPEARANCE</b>                                                        | White or off white crystalline powder |
| <b>SOLUBILITY</b>                                                        | Conforms                              |
| <b>IDENTIFICATION</b>                                                    | Conforms                              |
| <b>CLEAR AND COLOUR</b>                                                  | Conforms                              |
| <b>HEAVY METALS</b>                                                      | <10 ppm                               |
| <b>LEAD</b>                                                              | <2 ppm                                |
| <b>SULPHATED ASH</b>                                                     | 0.07%                                 |
| <b>SPECIFIC OPTICAL ROTATION</b>                                         | 90.7°                                 |
| <b>MELTING POINT</b>                                                     | Conforms                              |
| <b>ORGANIC VOLATILE IMPURITY</b>                                         | Conforms                              |
| <b>ASSAY</b>                                                             | 99.9%                                 |
| <b>RELATED SUBSTANCES</b>                                                | Conforms                              |
| <b>LOSS ON DRYNG</b>                                                     | 0.08%                                 |
| <b>TOTAL PLATE COUNT</b>                                                 | <1000 cfu/g                           |
| <b>YEAST &amp; MOLD</b>                                                  | <100 cfu/g                            |
| <b>E. COLI</b>                                                           | Negative                              |
| <b>SALMONELLA</b>                                                        | Negative                              |
| <b>CONCLUSION</b>                                                        | Conforms to USP38/EP8                 |
| <b>COPY CONFORM TO THE ORIGINAL DOCUMENT – VALID ALTHOUGH NOT SIGNED</b> |                                       |



via G. Rossetti 19  
20145 Milano (MI)  
Italy

| <b>CERTIFICATO D'ANALISI</b><br>CERTIFICATE OF ANALYSIS                  |                                                                                                                             |
|--------------------------------------------------------------------------|-----------------------------------------------------------------------------------------------------------------------------|
| <b>PRODUCT</b>                                                           | <b>(6S)-5-METHYLTETRAHYDROFOLIC ACID, GLUCOSAMINE SALT (QUATREFOLIC®)</b>                                                   |
| <b>LOT.</b>                                                              | 0001701113                                                                                                                  |
| <b>APPEARANCE</b>                                                        | Creamy to light brown powder                                                                                                |
| <b>MOLECULAR FORMULA</b>                                                 | C <sub>20</sub> H <sub>23</sub> N <sub>7</sub> O <sub>6</sub> (C <sub>6</sub> H <sub>14</sub> N <sub>5</sub> ) <sub>2</sub> |
| <b>MOLECULAR WEIGHT</b>                                                  | 817.80                                                                                                                      |
| <b>IDENTIFICATION (IR)</b>                                               | Conforms                                                                                                                    |
| <b>WATER CONTENT (K.F.)</b>                                              | <=8.0%                                                                                                                      |
| <b>GLUCOSAMINE ASSAY ON D.B. (HPLC)</b>                                  | 34-36%                                                                                                                      |
| <b>5-METHYLTETRAHYDROFOLIC ACID ASSAY ON D.B. (HPLC)</b>                 | 54-59%                                                                                                                      |
| <b>TOTAL IMPURITIES</b>                                                  | <=2.5%                                                                                                                      |
| <b>LEAD</b>                                                              | <=0.3 ppm                                                                                                                   |
| <b>ARSENIC</b>                                                           | <=1.5 ppm                                                                                                                   |
| <b>MERCURY</b>                                                           | <=0.1 ppm                                                                                                                   |
| <b>CADMIUM</b>                                                           | <=0.5 ppm                                                                                                                   |
| <b>BORON</b>                                                             | <=10 ppm                                                                                                                    |
| <b>TOTAL PLATE COUNT</b>                                                 | <100 cfu/g                                                                                                                  |
| <b>YEAST &amp; MOLD</b>                                                  | <100 cfu/g                                                                                                                  |
| <b>E. COLI</b>                                                           | Negative/10 g                                                                                                               |
| <b>SALMONELLA</b>                                                        | Negative 25/g                                                                                                               |
| <b>ASSAY (ON DRIED BASIS)</b>                                            | 99.0%                                                                                                                       |
| <b>COPY CONFORM TO THE ORIGINAL DOCUMENT – VALID ALTHOUGH NOT SIGNED</b> |                                                                                                                             |



via G. Rossetti 19  
20145 Milano (MI)  
Italy

| <b>CERTIFICATO D'ANALISI</b><br>CERTIFICATE OF ANALYSIS                  |                                  |
|--------------------------------------------------------------------------|----------------------------------|
| <b>PRODUCT</b>                                                           | <b>L-GLUTAMINE KYOWA QUALITY</b> |
| <b>LOT.</b>                                                              | GM-PL-17462                      |
| <b>APPEARANCE</b>                                                        | White Crystalline Powder         |
| <b>IDENTIFICATION</b>                                                    | Conforms                         |
| <b>STATE OF SOLUTION</b>                                                 | NLT 99.2%                        |
| <b>pH</b>                                                                | 5.1                              |
| <b>SPECIFIC ROTATION (AT 20°C)</b>                                       | +7.0                             |
| <b>CHLORIDE</b>                                                          | NMT 0.020%                       |
| <b>SULFATE</b>                                                           | NMT 0.020%                       |
| <b>IRON</b>                                                              | NMT 100 ppm                      |
| <b>HAVY METALS</b>                                                       | NMT 5 ppm                        |
| <b>LEAD</b>                                                              | NMT 5 ppm                        |
| <b>ARSENIC</b>                                                           | NMT 1 ppm                        |
| <b>FOREIGN AMINO ACID</b>                                                | NMT 0.5%                         |
| <b>LOSS ON DRYING</b>                                                    | 0.01%                            |
| <b>RESIDUE OF IGNITION</b>                                               | 0.01%                            |
| <b>ASSAY (DRIED BASIS)</b>                                               | 99.5%                            |
| <b>TOTAL COUNT (CFU)</b>                                                 | NMT 1.000/g                      |
| <b>YEST AND MOLDS (CFU)</b>                                              | NMT 100/g                        |
| <b>COLIFORM</b>                                                          | NEG                              |
| <b>INSOLUBLE FOREIGN MATTER</b>                                          | Conforms                         |
| <b>COPY CONFORM TO THE ORIGINAL DOCUMENT – VALID ALTHOUGH NOT SIGNED</b> |                                  |



via G. Rossetti 19  
20145 Milano (MI)  
Italy

| <b>CERTIFICATO D'ANALISI</b>                                                |                                                                                                           |
|-----------------------------------------------------------------------------|-----------------------------------------------------------------------------------------------------------|
| CERTIFICATE OF ANALYSIS                                                     |                                                                                                           |
| <b>PRODOTTO</b>                                                             | <b>Amino acid Mix:</b> L-Lysine HCl, L-Proline, L-Glycine, N-acetyl-L-Cysteine, L-Arginine, L-Methionine. |
| <b>LOT.</b>                                                                 | 201217                                                                                                    |
| <b>APPEARANCE</b>                                                           | White crystalline powder or colorless crystals                                                            |
| <b>STATE OF SOLUTION</b>                                                    | >95%                                                                                                      |
| <b>CHLORIDE</b>                                                             | <=0.02%                                                                                                   |
| <b>AMMONIUM</b>                                                             | <=0.02%                                                                                                   |
| <b>SULFATE</b>                                                              | <=0.02%                                                                                                   |
| <b>MERCURY</b>                                                              | <0.1 ppm                                                                                                  |
| <b>LEAD</b>                                                                 | < 5 ppm                                                                                                   |
| <b>ARSENIC</b>                                                              | <1 ppm                                                                                                    |
| <b>CADMIUM</b>                                                              | < 1 ppm                                                                                                   |
| <b>HEAVY METALS</b>                                                         | <= 10 ppm                                                                                                 |
| <b>LOSS ON DRYING</b>                                                       | <=0.2%                                                                                                    |
| <b>RESIDUE ON IGNITION</b>                                                  | <=0.10%                                                                                                   |
| <b>TOTAL PLATE COUNT</b>                                                    | <1000 cfu/g CONFORM                                                                                       |
| <b>YEAST AND MOLDS</b>                                                      | <100 cfu/g CONFORM                                                                                        |
| <b>E. COLI</b>                                                              | Negative cfu/g                                                                                            |
| <b>SALMONELLA</b>                                                           | Negative/25 g                                                                                             |
| <b>ASSAY</b>                                                                | 99.5%                                                                                                     |
| <b>CONCLUSION</b>                                                           | Product conform to USP36/USP/24FCC/AJ192/JP15                                                             |
| <b>COPY CONFORM TO THE ORIGINAL DOCUMENT(s) – VALID ALTHOUGH NOT SIGNED</b> |                                                                                                           |

**CERTIFICATO D'ANALISI**

CERTIFICATE OF ANALYSIS

|                                                                          |                                                                                                                                                                                                                                                                                                                 |
|--------------------------------------------------------------------------|-----------------------------------------------------------------------------------------------------------------------------------------------------------------------------------------------------------------------------------------------------------------------------------------------------------------|
| <b>PRODOTTO</b>                                                          | <b>OXXYNEA® (MIX SOLUBILE DI ESTRATTI DA FRUTTA E VERDURA)</b>                                                                                                                                                                                                                                                  |
| <b>LOT.</b>                                                              | OXFP170316                                                                                                                                                                                                                                                                                                      |
| <b>TIPO DI PREPARAZIONE UTILIZZATA</b>                                   | Polvere ad alto potere antiossidante ottenuta da una miscela di frutti e verdure standardizzata in valore ORAC (1 g = 3500 valori ORAC)                                                                                                                                                                         |
| <b>ORIGINE</b>                                                           | France, Spain, Italy                                                                                                                                                                                                                                                                                            |
| <b>ASPECT</b>                                                            | Fine powder                                                                                                                                                                                                                                                                                                     |
| <b>COLOUR</b>                                                            | Brown                                                                                                                                                                                                                                                                                                           |
| <b>TASTE</b>                                                             | Characteristic                                                                                                                                                                                                                                                                                                  |
| <b>ODOR</b>                                                              | Typical                                                                                                                                                                                                                                                                                                         |
| <b>COMPOSITION</b>                                                       | Estratto da frutta 40-50%: Semi d'uva (rossa, bianca), Arancia, Pompelmo, Papaia, Ananas, Fragole, Ciliegie, Mela, Albicocca, Mirtillo, Ribes nero.<br>Estratto da vegetali: 30-40%: Pomodoro, Carote, Cocomero, Tè verde, Broccoli, Cavolo, Cipolla, Aglio, Asparago, Olive, Cetriolo.<br>Maltodestrina 10-20% |
| <b>TOTAL POLYPHENOLS (% CATECHINE EQ.)</b>                               | 83.41%                                                                                                                                                                                                                                                                                                          |
| <b>ORAC VALUE (µmol TE/g)</b>                                            | 11773.1%                                                                                                                                                                                                                                                                                                        |
| <b>LOSS ON DRYING %</b>                                                  | 0.1%                                                                                                                                                                                                                                                                                                            |
| <b>ASH %</b>                                                             | 1.5%                                                                                                                                                                                                                                                                                                            |
| <b>SOLUBILITY (1% W/V)</b>                                               | CONFORMS                                                                                                                                                                                                                                                                                                        |
| <b>Ph (10% W/V)</b>                                                      | 4.4                                                                                                                                                                                                                                                                                                             |
| <b>BULK DENSITY</b>                                                      | 0.50                                                                                                                                                                                                                                                                                                            |
| <b>TAPPED DENSITY</b>                                                    | 0.70                                                                                                                                                                                                                                                                                                            |
| <b>MESH SIZE (US mesh)</b>                                               | CONFORMS                                                                                                                                                                                                                                                                                                        |
| <b>ARSENIC (As)</b>                                                      | <0.1 ppm                                                                                                                                                                                                                                                                                                        |
| <b>CADMIUM (Cd)</b>                                                      | 0.01% ppm                                                                                                                                                                                                                                                                                                       |
| <b>MERCURY (Hg)</b>                                                      | <0.005 ppm                                                                                                                                                                                                                                                                                                      |
| <b>LEAD (Pb)</b>                                                         | 0.06 ppm                                                                                                                                                                                                                                                                                                        |
| <b>TOTAL PLATE COUNT</b>                                                 | <1000 cfu/g CONFORM                                                                                                                                                                                                                                                                                             |
| <b>YEAST AND MOLDS</b>                                                   | <100 cfu/g CONFORM                                                                                                                                                                                                                                                                                              |
| <b>COLIFORMS</b>                                                         | Negative cfu/1 g                                                                                                                                                                                                                                                                                                |
| <b>SALMONELLA</b>                                                        | Negative/25 g                                                                                                                                                                                                                                                                                                   |
| <b>STAPHYLOCOCCUS AUREUS</b>                                             | Negative cfu/1 g                                                                                                                                                                                                                                                                                                |
| <b>COPY CONFORM TO THE ORIGINAL DOCUMENT – VALID ALTHOUGH NOT SIGNED</b> |                                                                                                                                                                                                                                                                                                                 |

| <b>CERTIFICATO D'ANALISI</b><br>CERTIFICATE OF ANALYSIS                  |                                                                |
|--------------------------------------------------------------------------|----------------------------------------------------------------|
| <b>PRODUCT NAME</b>                                                      | <b>BROCCOLI 1:25</b>                                           |
| <b>LOT.</b>                                                              | NUT/16/0896                                                    |
| <b>BOTANICAL NAME</b>                                                    | Brassica oleracea L.                                           |
| <b>EXTRACTION SOLVENT</b>                                                | Water                                                          |
| <b>E/D RATIO</b>                                                         | 1:25                                                           |
| <b>EXCIPIENT</b>                                                         | Maltodextrin from maize                                        |
| <b>AUXILIARY SUBSTANCE</b>                                               | <=0.5% colloidal anhydrous silica                              |
| <b>PREPARATION TYPE</b>                                                  | Dry extract                                                    |
| <b>PART OF PLANT USED</b>                                                | Leaves                                                         |
| <b>ORIGIN</b>                                                            | Italy                                                          |
| <b>ASPECT</b>                                                            | Powder                                                         |
| <b>COLOUR</b>                                                            | Brownish to greenish                                           |
| <b>TASTE</b>                                                             | Characteristic                                                 |
| <b>ODOR</b>                                                              | Characteristic                                                 |
| <b>IDENTIFICATION</b>                                                    | Complies (met. TLC)                                            |
| <b>PARTICLE SIZE</b>                                                     | >=90% through 35 Mesh (500 micron)                             |
| <b>DENSITY</b>                                                           | 0.5 g/ml ~                                                     |
| <b>LOSS ON DRYING</b>                                                    | <=5%                                                           |
| <b>HEAVY METALS</b>                                                      | <10 ppm<br>Pb <3 ppm; Cd <1 ppm; Hg <0.1 ppm                   |
| <b>RESIDUAL SOLVENTS</b>                                                 | Complies to Directive 2009/32/EC                               |
| <b>PESTICIDES</b>                                                        | Complies to Reg. 2008/839/CE                                   |
| <b>POLYCYCLIC AROMATIC HYDROCARBONS</b>                                  | Conforms to Reg. UE 1933/2015                                  |
| <b>AFLATOXINS</b>                                                        | Aflatoxin B1: <5 ppb<br>Total aflatoxin (B1,B2,G1,G2): <10 ppb |
| <b>BACTERIAL COUNT (TAMC)</b>                                            | <= 5x10000 cfu/g                                               |
| <b>YEAST AND MOUDS (TYMC)</b>                                            | <= 5x10 cfu/g                                                  |
| <b>PATHOGENS</b>                                                         | Salmonella: absent/25g<br>E. Coli: absent/1 g                  |
| <b>ENTEROBACTERIACEE</b>                                                 | <=100 cfu/g                                                    |
| <b>GLUTEN FREE</b>                                                       | Yes                                                            |
| <b>COPY CONFORM TO THE ORIGINAL DOCUMENT – VALID ALTHOUGH NOT SIGNED</b> |                                                                |



via G. Rossetti 19  
20145 Milano (MI)  
Italy

| <b>CERTIFICATO D'ANALISI</b><br>CERTIFICATE OF ANALYSIS                  |                           |
|--------------------------------------------------------------------------|---------------------------|
| <b>PRODUCT</b>                                                           | <b>BITARTRATE CHOLINE</b> |
| <b>LOT.</b>                                                              | 3012864                   |
| <b>APPEARANCE</b>                                                        | WHITE CRYSTALLINE POWDER  |
| <b>IDENTIFICATION</b>                                                    | COMPLIES (IR, B)          |
| <b>SPECIFIC ROTATION</b>                                                 | +17.9°                    |
| <b>pH (10%)</b>                                                          | 3.4                       |
| <b>WATER</b>                                                             | 0.07%                     |
| <b>RESIDUE ON IGNITION</b>                                               | <0.1%                     |
| <b>AS</b>                                                                | <2 ppm                    |
| <b>LEAD</b>                                                              | <0.3 ppm                  |
| <b>TOTAL AMINES</b>                                                      | 4.1 ppm                   |
| <b>CROMATOGRAPHIC PURITY</b>                                             | Conforms                  |
| <b>O.V.I.</b>                                                            | Conforms                  |
| <b>1.4 DIOXANE</b>                                                       | Conforms                  |
| <b>HEAVY METAL</b>                                                       | <10 ppm                   |
| <b>ASSAY (anhydrous basis)</b>                                           | 99.52%                    |
| <b>TOTAL AEROBIC COUNT</b>                                               | <1000 cfu/g               |
| <b>YEAST &amp; MOLD</b>                                                  | <100 cfu/g                |
| <b>E. COLI</b>                                                           | Negative/10 g             |
| <b>SALMONELLA</b>                                                        | Negative/25 g             |
| <b>CONFORM</b>                                                           | USP/DAB                   |
| <b>COPY CONFORM TO THE ORIGINAL DOCUMENT – VALID ALTHOUGH NOT SIGNED</b> |                           |



via G. Rossetti 19  
20145 Milano (MI)  
Italy

| <b>CERTIFICATO D'ANALISI</b>                                             |                                              |
|--------------------------------------------------------------------------|----------------------------------------------|
| CERTIFICATE OF ANALYSIS                                                  |                                              |
| <b>PRODUCT</b>                                                           | <b>INOSITOL</b>                              |
| <b>LOT.</b>                                                              | HZ-IN1702065                                 |
| <b>APPEARANCE</b>                                                        | WHITE CRYSTALLINE POWDER                     |
| <b>IDENTIFICATION</b>                                                    | Positive reaction (A,B)                      |
| <b>MELTING POINT</b>                                                     | 225.3-226.4°C                                |
| <b>LOSS ON DRYING</b>                                                    | 0.02%                                        |
| <b>RESIDUE ON IGNITION</b>                                               | 0.02%                                        |
| <b>CLARITY/COLOR OF SOLUTION</b>                                         | meet the requirement                         |
| <b>CHLORIDE</b>                                                          | <0.005%                                      |
| <b>SULFATE</b>                                                           | <0.006%                                      |
| <b>CALCIUM</b>                                                           | meet the requirement                         |
| <b>HEAVY METALS</b>                                                      | <5 ppm                                       |
| <b>LEAD</b>                                                              | <0.5 ppm                                     |
| <b>ARSENIC</b>                                                           | <0.5 ppm                                     |
| <b>CADMIUM</b>                                                           | <0.5 ppm                                     |
| <b>MERCURY</b>                                                           | <0.1 ppm                                     |
| <b>TOTAL PLATE COUNT</b>                                                 | <10 cfu/g                                    |
| <b>YEAST &amp; MOLD</b>                                                  | <10 cfu/g                                    |
| <b>E. COLI</b>                                                           | Negative/10 g                                |
| <b>SALMONELLA</b>                                                        | Negative/25 g                                |
| <b>ASSAY</b>                                                             | 98.59%                                       |
| <b>CONCLUSION</b>                                                        | The good are complied with FCCVIX/USP38/NF33 |
| <b>COPY CONFORM TO THE ORIGINAL DOCUMENT – VALID ALTHOUGH NOT SIGNED</b> |                                              |





via G. Rossetti 19  
20145 Milano (MI)  
Italy

| <b>CERTIFICATO D'ANALISI</b><br>CERTIFICATE OF ANALYSIS                  |                                               |
|--------------------------------------------------------------------------|-----------------------------------------------|
| <b>PRODUCT</b>                                                           | <b>PARA-AMINOBENZOIC ACID</b>                 |
| <b>LOT.</b>                                                              | 17E15-B09                                     |
| <b>APPEARANCE</b>                                                        | WHITE CRYSTALLINE POWDER                      |
| <b>IDENTIFICATION</b>                                                    | Conforms                                      |
| <b>PARTICLE SIZE (MESH)</b>                                              | Conforms                                      |
| <b>ASSAY (ON DRIED BASIS)</b>                                            | 99.75%                                        |
| <b>RESIDUE ON IGNITION</b>                                               | 0.01%                                         |
| <b>LOSS ON DRYING</b>                                                    | 0.08%                                         |
| <b>HUMIDITY</b>                                                          | 1.1%                                          |
| <b>HEAVY METALS</b>                                                      | <20 ppm                                       |
| <b>TOTAL PLATE COUNT</b>                                                 | <1000 cfu/g                                   |
| <b>MERCURY</b>                                                           | <0.1 ppm                                      |
| <b>CADMIUM</b>                                                           | <1 ppm                                        |
| <b>YEAST &amp; MOLD</b>                                                  | <100 cfu/g                                    |
| <b>E. COLI</b>                                                           | Negative/1g                                   |
| <b>SALMONELLA</b>                                                        | Negative/25g                                  |
| <b>CHEMICAL FORMULA</b>                                                  | C <sub>7</sub> H <sub>7</sub> N <sub>02</sub> |
| <b>COPY CONFORM TO THE ORIGINAL DOCUMENT – VALID ALTHOUGH NOT SIGNED</b> |                                               |

| <b>CERTIFICATO D'ANALISI</b><br>CERTIFICATE OF ANALYSIS                  |                                  |
|--------------------------------------------------------------------------|----------------------------------|
| <b>PRODOTTO</b>                                                          | <b>CITRUS BIOFLAVONOIDS 60%</b>  |
| <b>LOT.</b>                                                              | 201711016                        |
| <b>EXTRACT RATIO</b>                                                     | 1 g Extract to 5-7 g Herbs       |
| <b>SOURCE</b>                                                            | Fruit of the Citrus Aurantium L. |
| <b>APPEARANCE</b>                                                        | Fine powder                      |
| <b>COLOUR</b>                                                            | Light brown                      |
| <b>AROMA</b>                                                             | Characteristic                   |
| <b>FLOVOUR</b>                                                           | Characteristic                   |
| <b>IDENTIFICATION</b>                                                    | Positive                         |
| <b>ASSAY BIOFLAVONOID</b>                                                | 61.2%                            |
| <b>SIEVE ANALYSIS</b>                                                    | 98% Pass 80 Mesh                 |
| <b>LOSS ON DRYING</b>                                                    | 1.4%                             |
| <b>ASH</b>                                                               | 0.4%                             |
| <b>BULK DENSITY</b>                                                      | 0.41 g/ml                        |
| <b>HEAVY METAL</b>                                                       | < 10 ppm                         |
| <b>ARSENIC</b>                                                           | <1 ppm                           |
| <b>LEAD</b>                                                              | <1 ppm                           |
| <b>CADMIUM</b>                                                           | <1 ppm                           |
| <b>MERCURY</b>                                                           | <0.1 ppm                         |
| <b>SULPHATE</b>                                                          | <5 ppm                           |
| <b>TOTAL PLATE COUNT</b>                                                 | 20 cfu/g                         |
| <b>YEAST AND MOULDS</b>                                                  | 20 cfu/g                         |
| <b>E.COLI</b>                                                            | Negative                         |
| <b>SALMONELLA</b>                                                        | Negative                         |
| <b>STAPHYLOCOCCUS AUREUS</b>                                             | Negative                         |
| <b>COLIFORMS</b>                                                         | Max 30 cfu/g Conforms            |
| <b>GMO STATUS</b>                                                        | Non-GMO                          |
| <b>IRRADIATION STATUS</b>                                                | Non Irradiated                   |
| <b>BSE/TSE STATUS</b>                                                    | BSE/TSE Free                     |
| <b>SUITABLE FOR VEGETARIAN</b>                                           | YES                              |
| <b>SUITABLE FOR VEGANS</b>                                               | YES                              |
| <b>COPY CONFORM TO THE ORIGINAL DOCUMENT – VALID ALTHOUGH NOT SIGNED</b> |                                  |



via G. Rossetti 19  
20145 Milano (MI)  
Italy

| <b>CERTIFICATO D'ANALISI</b>                                             |                               |
|--------------------------------------------------------------------------|-------------------------------|
| CERTIFICATE OF ANALYSIS                                                  |                               |
| <b>PRODOTTO</b>                                                          | <b>PINE BARK EXTRACT</b>      |
| <b>LOT.</b>                                                              | 20181020                      |
| <b>DESCRIPTION</b>                                                       | Fine powder brown/reddish     |
| <b>ODOR</b>                                                              | Characteristic                |
| <b>DENSITY</b>                                                           | 500 g/l                       |
| <b>TASTE</b>                                                             | Characteristic                |
| <b>IDENTIFICATION</b>                                                    | Positive (TLC)                |
| <b>LIPOSOLUBILITY</b>                                                    | Partially liposoluble         |
| <b>EXSTACTION SOLVENT</b>                                                | water/ethanol                 |
| <b>RESIDUAL SOLVENT</b>                                                  | Conform to Reg (CE) 32/2009   |
| <b>HEAVY METAL</b>                                                       | Pb<3 ppm; Cd<1ppm; Hg<0.1 ppm |
| <b>YEAST AND MOULDS</b>                                                  | Conforms (<5*100 ufc/g)       |
| <b>TOTAL PLATE COUNT</b>                                                 | Conforms (<5*10000 ufc/g)     |
| <b>E.COLI</b>                                                            | Negative                      |
| <b>SALMONELLA</b>                                                        | Negative                      |
| <b>TOTAL SOLIDS</b>                                                      | 3.72%                         |
| <b>ASSAY</b>                                                             | 90.8% pycnogenol              |
| <b>GMO STATUS</b>                                                        | Free                          |
| <b>BSE/TSE STATUS</b>                                                    | Free                          |
| <b>AFLATOXIN</b>                                                         | <10 ppb                       |
| <b>CONFORM</b>                                                           | USP/FCC/EP                    |
| <b>COPY CONFORM TO THE ORIGINAL DOCUMENT – VALID ALTHOUGH NOT SIGNED</b> |                               |

| <b>CERTIFICATO D'ANALISI</b><br>CERTIFICATE OF ANALYSIS                  |                       |
|--------------------------------------------------------------------------|-----------------------|
| <b>PRODOTTO</b>                                                          | <b>ASTAXANTHIN 5%</b> |
| <b>LOT.</b>                                                              | 20171103F             |
| <b>APPEARANCE</b>                                                        | Powder                |
| <b>COLOUR</b>                                                            | Dark red              |
| <b>AROMA</b>                                                             | Characteristic        |
| <b>FLAVOUR</b>                                                           | Characteristic        |
| <b>IDENTIFICATION</b>                                                    | Positive              |
| <b>ASSAY (as dried substance)</b>                                        | 5. 23% Astaxanthin    |
| <b>SIEVE ANALYSIS</b>                                                    | Conforms              |
| <b>ASH</b>                                                               | 4.63%                 |
| <b>LOSS ON DRYING</b>                                                    | 0.98%                 |
| <b>LEAD (Pb)</b>                                                         | Max 3 ppm             |
| <b>CADMIUM (Cd)</b>                                                      | Max. 1 ppm            |
| <b>ARSENIC (As)</b>                                                      | Max 1 ppm             |
| <b>MERCURY (Hg)</b>                                                      | Max 0.1 ppm           |
| <b>TOTAL PLATE COUNT</b>                                                 | 360 cfu/g             |
| <b>YEAST AND MOULDS</b>                                                  | 5 cfu/g               |
| <b>SALMONELLA</b>                                                        | Negative              |
| <b>STAPHYLOCOCCUS AUREUS</b>                                             | Negative              |
| <b>COLIFORMS</b>                                                         | Conforms              |
| <b>SHIGELLA</b>                                                          | Negative              |
| <b>GMO STATUS</b>                                                        | Non-GMO               |
| <b>IRRADIATION STATUS</b>                                                | Non Irradiated        |
| <b>BSE/TSE STATUS</b>                                                    | BSE/TSE Free          |
| <b>CONFORM</b>                                                           | USP/FCC/EP/FDA        |
| <b>COPY CONFORM TO THE ORIGINAL DOCUMENT – VALID ALTHOUGH NOT SIGNED</b> |                       |

| <b>CERTIFICATO D'ANALISI</b><br>CERTIFICATE OF ANALYSIS                  |                  |
|--------------------------------------------------------------------------|------------------|
| <b>PRODOTTO</b>                                                          | <b>LUTEIN 5%</b> |
| <b>LOT.</b>                                                              | MAE-170701       |
| <b>APPEARANCE</b>                                                        | Fine Powder      |
| <b>COLOUR</b>                                                            | Orange Yellow    |
| <b>AROMA</b>                                                             | Characteristic   |
| <b>FLAVOUR</b>                                                           | Characteristic   |
| <b>IDENTIFICATION</b>                                                    | Positive         |
| <b>ASSAY (as dried substance)</b>                                        | 5.19 % Lutein    |
| <b>SIEVE ANALYSIS</b>                                                    | Conforms         |
| <b>ASH</b>                                                               | 0.66%            |
| <b>LOSS ON DRYING</b>                                                    | 0.64%            |
| <b>HEAVY METALS</b>                                                      | Max. 5 ppm       |
| <b>LEAD (Pb)</b>                                                         | Max 1 ppm        |
| <b>CADMIUM (Cd)</b>                                                      | Max. 2 ppm       |
| <b>ARSENIC (As)</b>                                                      | Max 2 ppm        |
| <b>MERCURY (Hg)</b>                                                      | Max 0.1 ppm      |
| <b>TOTAL PLATE COUNT</b>                                                 | <1000 cfu/g      |
| <b>YEAST AND MOULDS</b>                                                  | <100 cfu/g       |
| <b>E. COLI</b>                                                           | Negative         |
| <b>SALMONELLA</b>                                                        | Negative         |
| <b>STAPHYLOCOCCUS AUREUS</b>                                             | Negative         |
| <b>GMO STATUS</b>                                                        | Non-GMO          |
| <b>IRRADIATION STATUS</b>                                                | Non Irradiated   |
| <b>BSE/TSE STATUS</b>                                                    | BSE/TSE Free     |
| <b>CONFORM</b>                                                           | USP/FCC/EP/FDA   |
| <b>COPY CONFORM TO THE ORIGINAL DOCUMENT – VALID ALTHOUGH NOT SIGNED</b> |                  |

| <b>CERTIFICATO D'ANALISI</b>                                             |                          |
|--------------------------------------------------------------------------|--------------------------|
| CERTIFICATE OF ANALYSIS                                                  |                          |
| <b>PRODOTTO</b>                                                          | <b>ALPHA LIPOIC ACID</b> |
| <b>LOT.</b>                                                              | ALA.G.1801101            |
| <b>APPEARANCE</b>                                                        | Granular                 |
| <b>COLOUR</b>                                                            | Yellowish                |
| <b>AROMA</b>                                                             | Characteristic           |
| <b>FLAVOUR</b>                                                           | Characteristic           |
| <b>IDENTIFICATION</b>                                                    | Positive                 |
| <b>ASSAY (as dried substance)</b>                                        | 99.3%                    |
| <b>MELTING POINT</b>                                                     | 61.54°C                  |
| <b>SPECIFIC ROTATION</b>                                                 | 0°                       |
| <b>SIEVE ANALYSIS</b>                                                    | Conforms                 |
| <b>ASH</b>                                                               | 0.04%                    |
| <b>LOSS ON DRYING</b>                                                    | 0.13%                    |
| <b>PARTICLE SIZE</b>                                                     | Conforms                 |
| <b>BULK DENSITY</b>                                                      | 0.50 g/ml                |
| <b>TAPPED DENSITY</b>                                                    | Conforms                 |
| <b>HEAVY METALS</b>                                                      | Max. 10 ppm              |
| <b>LEAD (Pb)</b>                                                         | Max 3 ppm                |
| <b>CADMIUM (Cd)</b>                                                      | Max. 1 ppm               |
| <b>ARSENIC (As)</b>                                                      | Max 1 ppm                |
| <b>MERCURY (Hg)</b>                                                      | Max 0.1 ppm              |
| <b>TOTAL PLATE COUNT</b>                                                 | <1000 cfu/g              |
| <b>YEAST AND MOULDS</b>                                                  | <100 cfu/g               |
| <b>E. COLI</b>                                                           | Negative                 |
| <b>SALMONELLA</b>                                                        | Negative                 |
| <b>STAPHYLOCOCCUS AUREUS</b>                                             | Negative                 |
| <b>SINGLE IMPURITY</b>                                                   | 0.07%                    |
| <b>TOTAL IMPURITIES</b>                                                  | 0.016%                   |
| <b>LIMIT OF POLYMER</b>                                                  | Conforms to USP          |
| <b>GMO STATUS</b>                                                        | Non-GMO                  |
| <b>IRRADIATION STATUS</b>                                                | Non Irradiated           |
| <b>BSE/TSE STATUS</b>                                                    | BSE/TSE Free             |
| <b>CONFORM</b>                                                           | USP/FCC/EP/FDA           |
| <b>COPY CONFORM TO THE ORIGINAL DOCUMENT – VALID ALTHOUGH NOT SIGNED</b> |                          |



via G. Rossetti 19  
20145 Milano (MI)  
Italy

| <b>CERTIFICATO D'ANALISI</b>                                             |                                                            |
|--------------------------------------------------------------------------|------------------------------------------------------------|
| CERTIFICATE OF ANALYSIS                                                  |                                                            |
| <b>PRODOTTO</b>                                                          | <b>ACEROLA 25% VIT. C (Malpighia punicifolia L.) fruit</b> |
| <b>LOT.</b>                                                              | L100181L                                                   |
| <b>APPEARANCE</b>                                                        | Rosy fine powder, odour characteristic                     |
| <b>LOSS ON DRYING</b>                                                    | < 5%                                                       |
| <b>ASH</b>                                                               | < 15%                                                      |
| <b>ASSAY</b>                                                             | <25% Vit. C                                                |
| <b>LEAD (Pb)</b>                                                         | Max 3 ppm                                                  |
| <b>CADMIUM (Cd)</b>                                                      | Max. 1 ppm                                                 |
| <b>ARSENIC (As)</b>                                                      | Max 1 ppm                                                  |
| <b>MERCURY (Hg)</b>                                                      | Max 0.1 ppm                                                |
| <b>AFLATOXIN Bb1,B2,G1,G2</b>                                            | < 10 PPB                                                   |
| <b>PARTICLE SIZE</b>                                                     | Conforms                                                   |
| <b>BULK DENSITY</b>                                                      | 600-700 g/L                                                |
| <b>TOTAL PLATE COUNT</b>                                                 | <5*10e4 cfu/g                                              |
| <b>YEAST AND MOULDS</b>                                                  | <5*10e2 cfu/g                                              |
| <b>E. COLI</b>                                                           | Negative                                                   |
| <b>SALMONELLA</b>                                                        | Negative                                                   |
| <b>GMO STATUS</b>                                                        | Non-GMO                                                    |
| <b>IRRADIATION STATUS</b>                                                | Non Irradiated                                             |
| <b>BSE/TSE STATUS</b>                                                    | BSE/TSE Free                                               |
| <b>CONFORM</b>                                                           | USP/FCC/EP/FDA                                             |
| <b>COPY CONFORM TO THE ORIGINAL DOCUMENT – VALID ALTHOUGH NOT SIGNED</b> |                                                            |

| <b>CERTIFICATO D'ANALISI</b>                                             |                        |
|--------------------------------------------------------------------------|------------------------|
| CERTIFICATE OF ANALYSIS                                                  |                        |
| <b>PRODOTTO</b>                                                          | <b>RESVERATROL 98%</b> |
| <b>LOT.</b>                                                              | NT180402003            |
| <b>APPEARANCE</b>                                                        | Fine Powder            |
| <b>COLOUR</b>                                                            | White                  |
| <b>AROMA</b>                                                             | Characteristic         |
| <b>FLAVOUR</b>                                                           | Characteristic         |
| <b>IDENTIFICATION</b>                                                    | Positive               |
| <b>ASSAY</b>                                                             | 98.81% Resveratrol     |
| <b>SIEVE ANALYSIS</b>                                                    | Conforms               |
| <b>ASH</b>                                                               | 0.26%                  |
| <b>LOSS ON DRYING</b>                                                    | 0.19%                  |
| <b>HEAVY METALS</b>                                                      | Max. 10 ppm            |
| <b>LEAD (Pb)</b>                                                         | Max 3 ppm              |
| <b>CADMIUM (Cd)</b>                                                      | Max. 1 ppm             |
| <b>ARSENIC (As)</b>                                                      | Max 1 ppm              |
| <b>MERCURY (Hg)</b>                                                      | Max 0.1 ppm            |
| <b>TOTAL PLATE COUNT</b>                                                 | <1000 cfu/g            |
| <b>YEAST AND MOULDS</b>                                                  | <100 cfu/g             |
| <b>E. COLI</b>                                                           | Negative               |
| <b>SALMONELLA</b>                                                        | Negative               |
| <b>STAPHYLOCOCCUS AUREUS</b>                                             | Negative               |
| <b>AFLATOXIN Bb1,B2,G1,G2</b>                                            | < 10 PPB               |
| <b>GMO STATUS</b>                                                        | Non-GMO                |
| <b>IRRADIATION STATUS</b>                                                | Non Irradiated         |
| <b>BSE/TSE STATUS</b>                                                    | BSE/TSE Free           |
| <b>CONFORM</b>                                                           | USP/FCC/EP/FDA         |
| <b>COPY CONFORM TO THE ORIGINAL DOCUMENT – VALID ALTHOUGH NOT SIGNED</b> |                        |



via G. Rossetti 19  
20145 Milano (MI)

| <b>CERTIFICATO D'ANALISI</b><br>CERTIFICATE OF ANALYSIS                  |                                |
|--------------------------------------------------------------------------|--------------------------------|
| <b>PRODOTTO</b>                                                          | <b>ASCORBYL PALMITATE</b>      |
| <b>LOT.</b>                                                              | 10500120180103                 |
| <b>APPEARANCE</b>                                                        | Fine powder Light white-yellow |
| <b>IDENTIFICATION</b>                                                    | Positive                       |
| <b>ASPECT</b>                                                            | Conform                        |
| <b>MELTING POINT</b>                                                     | CONFORM (ABOUT 115°C)          |
| <b>SPECIFIC ROTATION</b>                                                 | 23.4°                          |
| <b>LOSS ON DRYING</b>                                                    | 0.18%                          |
| <b>PERDITA ALLA CALCINAZIONE</b>                                         | 0.05%                          |
| <b>HEAVY METAL</b>                                                       | < 10 ppm                       |
| <b>ARSENIC</b>                                                           | <1 ppm                         |
| <b>LEAD</b>                                                              | <0.1 ppm                       |
| <b>MERCURY</b>                                                           | <0.1 ppm                       |
| <b>CADMIUM</b>                                                           | <1 ppm                         |
| <b>TOTAL PLATE COUNT</b>                                                 | <100 cfu/g                     |
| <b>YEAST AND MOULDS</b>                                                  | <10 cfu/g                      |
| <b>E. COLI</b>                                                           | Negative                       |
| <b>SALMONELLA</b>                                                        | Negative                       |
| <b>STAPHYLOCOCCUS AUREUS</b>                                             | Negative                       |
| <b>COLIFORMS</b>                                                         | Max 30 cfu/g Conforms          |
| <b>RESIDUAL SOLVENT</b>                                                  | <0.10%                         |
| <b>ASSAY (USP-FCC)</b>                                                   | 98.38%                         |
| <b>GMO STATUS</b>                                                        | Non-GMO                        |
| <b>IRRADIATION STATUS</b>                                                | Non Irradiated                 |
| <b>BSE/TSE STATUS</b>                                                    | BSE/TSE Free                   |
| <b>CONFORM</b>                                                           | USP/FCC/EP                     |
| <b>COPY CONFORM TO THE ORIGINAL DOCUMENT – VALID ALTHOUGH NOT SIGNED</b> |                                |

| <b>CERTIFICATO D'ANALISI</b>                                             |                          |
|--------------------------------------------------------------------------|--------------------------|
| CERTIFICATE OF ANALYSIS                                                  |                          |
| <b>PRODOTTO</b>                                                          | <b>CALCIUM ASCORBATE</b> |
| <b>LOT.</b>                                                              | 31703015                 |
| <b>APPEARANCE</b>                                                        | Fine powder Light white  |
| <b>IDENTIFICATION</b>                                                    | Positive                 |
| <b>ASPECT</b>                                                            | Conform                  |
| <b>pH (sol.10%)</b>                                                      | 7.3                      |
| <b>SPECIFIC ROTATION</b>                                                 | +96.2°                   |
| <b>LOSS ON DRYING</b>                                                    | 0.05%                    |
| <b>HEAVY METAL</b>                                                       | < 10 ppm                 |
| <b>FLUORIDE</b>                                                          | < 10 ppm                 |
| <b>OXALATES</b>                                                          | Conforms                 |
| <b>ARSENIC</b>                                                           | <1 ppm                   |
| <b>LEAD</b>                                                              | <2 ppm                   |
| <b>MERCURY</b>                                                           | <0.1 ppm                 |
| <b>CADMIUM</b>                                                           | <1 ppm                   |
| <b>TOTAL PLATE COUNT</b>                                                 | <1000 cfu/g              |
| <b>YEAST AND MOULDS</b>                                                  | 20 cfu/g                 |
| <b>E.COLI</b>                                                            | Negative                 |
| <b>SALMONELLA</b>                                                        | Negative                 |
| <b>STAPHYLOCOCCUS AUREUS</b>                                             | Negative                 |
| <b>COLIFORMS</b>                                                         | Max 30 cfu/g Conforms    |
| <b>RESIDUAL SOLVENT</b>                                                  | <3000 ppm                |
| <b>GMO STATUS</b>                                                        | Non-GMO                  |
| <b>IRRADIATION STATUS</b>                                                | Non Irradiated           |
| <b>BSE/TSE STATUS</b>                                                    | BSE/TSE Free             |
| <b>ASSAY (anhydrous basis)</b>                                           | 99.5%                    |
| <b>CONFORM</b>                                                           | USP/FCC                  |
| <b>COPY CONFORM TO THE ORIGINAL DOCUMENT – VALID ALTHOUGH NOT SIGNED</b> |                          |

| <b>CERTIFICATO D'ANALISI</b>                                             |                                           |
|--------------------------------------------------------------------------|-------------------------------------------|
| CERTIFICATE OF ANALYSIS                                                  |                                           |
| <b>PRODOTTO</b>                                                          | <b>GREEN TEA EXTRA XT 95% POLYPHENOLS</b> |
| <b>LOT.</b>                                                              | 11722                                     |
| <b>APPEARANCE</b>                                                        | Powder                                    |
| <b>COLOUR</b>                                                            | Light yellow to reddish brown             |
| <b>AROMA</b>                                                             | Characteristic                            |
| <b>FLAVOUR</b>                                                           | Characteristic                            |
| <b>IDENTIFICATION</b>                                                    | Positive                                  |
| <b>ASSAY</b>                                                             | 95% polyphenols, 40% EGCG                 |
| <b>SIEVE ANALYSIS</b>                                                    | Conforms                                  |
| <b>ASH</b>                                                               | Max 2%                                    |
| <b>LOSS ON DRYING</b>                                                    | Max 6%                                    |
| <b>HEAVY METALS</b>                                                      | Max. 10 ppm                               |
| <b>LEAD (Pb)</b>                                                         | Max 3 ppm                                 |
| <b>CADMIUM (Cd)</b>                                                      | Max. 1 ppm                                |
| <b>ARSENIC (As)</b>                                                      | Max 2 ppm                                 |
| <b>MERCURY (Hg)</b>                                                      | Max 0.1 ppm                               |
| <b>TOTAL PLATE COUNT</b>                                                 | <10000 cfu/g                              |
| <b>YEAST AND MOULDS</b>                                                  | <100 cfu/g                                |
| <b>E. COLI</b>                                                           | Negative                                  |
| <b>SALMONELLA</b>                                                        | Negative                                  |
| <b>STAPHYLOCOCCUS AUREUS</b>                                             | Negative                                  |
| <b>AFLATOXIN Bb1,B2,G1,G2</b>                                            | < 10 PPB                                  |
| <b>GMO STATUS</b>                                                        | Non-GMO                                   |
| <b>IRRADIATION STATUS</b>                                                | Non Irradiated                            |
| <b>BSE/TSE STATUS</b>                                                    | BSE/TSE Free                              |
| <b>CONFORM</b>                                                           | USP/FCC/EP/FDA                            |
| <b>COPY CONFORM TO THE ORIGINAL DOCUMENT – VALID ALTHOUGH NOT SIGNED</b> |                                           |



via G. Rossetti 19  
20145 Milano (MI)  
Italy

| <b>CERTIFICATO D'ANALISI</b>                                             |                                             |
|--------------------------------------------------------------------------|---------------------------------------------|
| CERTIFICATE OF ANALYSIS                                                  |                                             |
| <b>PRODOTTO</b>                                                          | <b>QUERCETIN (SOPHORA JAPONICA L.) SEED</b> |
| <b>LOT.</b>                                                              | NT1800705003                                |
| <b>APPEARANCE</b>                                                        | Crystalline Powder                          |
| <b>COLOUR</b>                                                            | yellow – green                              |
| <b>AROMA</b>                                                             | Characteristic                              |
| <b>FLAVOUR</b>                                                           | Characteristic                              |
| <b>IDENTIFICATION</b>                                                    | Positive                                    |
| <b>ASSAY</b>                                                             | 98.17% quercetin                            |
| <b>SIEVE ANALYSIS</b>                                                    | Conforms                                    |
| <b>ASH</b>                                                               | 0.16%                                       |
| <b>LOSS ON DRYING</b>                                                    | 9.93%                                       |
| <b>HEAVY METALS</b>                                                      | Max. 10 ppm                                 |
| <b>LEAD (Pb)</b>                                                         | Max 3 ppm                                   |
| <b>CADMIUM (Cd)</b>                                                      | Max. 1 ppm                                  |
| <b>ARSENIC (As)</b>                                                      | Max 1 ppm                                   |
| <b>MERCURY (Hg)</b>                                                      | Max 0.1 ppm                                 |
| <b>TOTAL PLATE COUNT</b>                                                 | <1000 cfu/g                                 |
| <b>YEAST AND MOULDS</b>                                                  | <100 cfu/g                                  |
| <b>E. COLI</b>                                                           | Negative                                    |
| <b>SALMONELLA</b>                                                        | Negative                                    |
| <b>STAPHYLOCOCCUS AUREUS</b>                                             | Negative                                    |
| <b>AFLATOXIN Bb1,B2,G1,G2</b>                                            | < 4 ppb                                     |
| <b>GMO STATUS</b>                                                        | Non-GMO                                     |
| <b>IRRADIATION STATUS</b>                                                | Non Irradiated                              |
| <b>BSE/TSE STATUS</b>                                                    | BSE/TSE Free                                |
| <b>CONFORM</b>                                                           | USP/FCC/EP/FDA                              |
| <b>COPY CONFORM TO THE ORIGINAL DOCUMENT – VALID ALTHOUGH NOT SIGNED</b> |                                             |

| <b>CERTIFICATO D'ANALISI</b>                                             |                                                 |
|--------------------------------------------------------------------------|-------------------------------------------------|
| CERTIFICATE OF ANALYSIS                                                  |                                                 |
| <b>PRODOTTO</b>                                                          | <b>TART CHERRY (PRUNUS CERASUS EXTRACT 4:1)</b> |
| <b>LOT.</b>                                                              | NT180630001                                     |
| <b>APPEARANCE</b>                                                        | Fine Powder                                     |
| <b>COLOUR</b>                                                            | Brown                                           |
| <b>AROMA</b>                                                             | Characteristic                                  |
| <b>FLAVOUR</b>                                                           | Characteristic                                  |
| <b>IDENTIFICATION</b>                                                    | Positive                                        |
| <b>ASSAY</b>                                                             | 04:01                                           |
| <b>SIEVE ANALYSIS</b>                                                    | Conforms                                        |
| <b>ASH</b>                                                               | 3.26%                                           |
| <b>LOSS ON DRYING</b>                                                    | 3.98%                                           |
| <b>HEAVY METALS</b>                                                      | Max. 10 ppm                                     |
| <b>LEAD (Pb)</b>                                                         | Max 3 ppm                                       |
| <b>CADMIUM (Cd)</b>                                                      | Max. 1 ppm                                      |
| <b>ARSENIC (As)</b>                                                      | Max 1 ppm                                       |
| <b>MERCURY (Hg)</b>                                                      | Max 0.1 ppm                                     |
| <b>TOTAL PLATE COUNT</b>                                                 | <1000 cfu/g                                     |
| <b>YEAST AND MOULDS</b>                                                  | <100 cfu/g                                      |
| <b>E. COLI</b>                                                           | Negative                                        |
| <b>SALMONELLA</b>                                                        | Negative                                        |
| <b>STAPHYLOCOCCUS AUREUS</b>                                             | Negative                                        |
| <b>AFLATOXIN Bb1,B2,G1,G2</b>                                            | < 4 PPB                                         |
| <b>GMO STATUS</b>                                                        | Non-GMO                                         |
| <b>IRRADIATION STATUS</b>                                                | Non Irradiated                                  |
| <b>BSE/TSE STATUS</b>                                                    | BSE/TSE Free                                    |
| <b>CONFORM</b>                                                           | USP/FCC/EP/FDA                                  |
| <b>COPY CONFORM TO THE ORIGINAL DOCUMENT – VALID ALTHOUGH NOT SIGNED</b> |                                                 |

| <b>CERTIFICATO D'ANALISI</b><br>CERTIFICATE OF ANALYSIS                  |                                                     |
|--------------------------------------------------------------------------|-----------------------------------------------------|
| <b>PRODOTTO</b>                                                          | <b>BROMELIN 2500 GDU/g (ANANAS COMOSUS L. MERR)</b> |
| <b>LOT.</b>                                                              | B01/CB4/18                                          |
| <b>APPEARANCE</b>                                                        | Powder                                              |
| <b>COLOUR</b>                                                            | White                                               |
| <b>AROMA</b>                                                             | Characteristic                                      |
| <b>FLAVOUR</b>                                                           | Characteristic                                      |
| <b>IDENTIFICATION</b>                                                    | Positive                                            |
| <b>ASSAY</b>                                                             | 2521 GDU/g                                          |
| <b>SIEVE ANALYSIS</b>                                                    | Conforms                                            |
| <b>ASH</b>                                                               | Conform                                             |
| <b>LOSS ON DRYING</b>                                                    | 3.9%                                                |
| <b>HEAVY METALS</b>                                                      | Max. 10 ppm                                         |
| <b>LEAD (Pb)</b>                                                         | Max 3 ppm                                           |
| <b>CADMIUM (Cd)</b>                                                      | Max. 1 ppm                                          |
| <b>ARSENIC (As)</b>                                                      | Max 1 ppm                                           |
| <b>MERCURY (Hg)</b>                                                      | Max 0.1 ppm                                         |
| <b>TOTAL PLATE COUNT</b>                                                 | <1000 cfu/g                                         |
| <b>YEAST AND MOULDS</b>                                                  | <100 cfu/g                                          |
| <b>E. COLI</b>                                                           | Negative                                            |
| <b>SALMONELLA</b>                                                        | Negative                                            |
| <b>STAPHYLOCOCCUS AUREUS</b>                                             | Negative                                            |
| <b>AFLATOXIN Bb1,B2,G1,G2</b>                                            | < 10 PPB                                            |
| <b>GMO STATUS</b>                                                        | Non-GMO                                             |
| <b>IRRADIATION STATUS</b>                                                | Non Irradiated                                      |
| <b>BSE/TSE STATUS</b>                                                    | BSE/TSE Free                                        |
| <b>CONFORM</b>                                                           | USP/FCC/EP/FDA                                      |
| <b>COPY CONFORM TO THE ORIGINAL DOCUMENT – VALID ALTHOUGH NOT SIGNED</b> |                                                     |

**NATUR-FARMA S.R.L.**  
 Via Mazzini 29/F 37040 Pressana (VR)  
 C.F / P.Iva : 04022190237  
 info@naturfarma.it Tel.0442 411196

22/06/19

Certificate of analysis  
 Certificado de analisis

VIT. E

**D-alpha tocopheryl acetate (700 UI-g) (VIT E Nat)  
 EP 8.0**

| Batch                     | Manufactured                                                                                                                                                                             | Expiration   |              |  |
|---------------------------|------------------------------------------------------------------------------------------------------------------------------------------------------------------------------------------|--------------|--------------|--|
| CP20170701                | 01/07/17                                                                                                                                                                                 | 30/06/19     |              |  |
| Characters                | Almost white, yellowish or light brown, small particles.                                                                                                                                 | Conform      | EP           |  |
| Identification:           |                                                                                                                                                                                          |              |              |  |
| Thin-layer chromatography | The principal spot in the chromatogram obtained with the test solution is similar in position and size to the principal spot in the chromatogram obtained with the reference solution.   | Positive     | EP<br>2.2.27 |  |
| Retention time            | The principal peak in the chromatogram obtained with the test solution is similar in retention time and size to the principal peak in the chromatogram obtained with reference solution. | Conform      | EP           |  |
| Assay                     | ≥51.5%                                                                                                                                                                                   | 54.6%        | EP<br>2.2.28 |  |
| Assay                     | ≥700IU                                                                                                                                                                                   | 742IU        | EP<br>2.2.28 |  |
| Loss on Drying            | ≤5.0%                                                                                                                                                                                    | 1.4%         | EP<br>2.2.23 |  |
| Bulk Density              | 0.45 g/cm(3)~0.60 g/cm(3)                                                                                                                                                                | 0.45 g/cm(3) | EP<br>2.9.34 |  |
| Particle Size             | Residue on 40 meshes ≤1%                                                                                                                                                                 | Conform      | EP<br>2.9.38 |  |
| *Benzo(a)Pyrene           | ≤2 ppb                                                                                                                                                                                   | < 2ppb       | HPLC         |  |
| *Heavy Metals (as Pb)     | ≤10ppm                                                                                                                                                                                   | < 10ppm      | EP 2.4.8     |  |
| *Heavy Metals:            |                                                                                                                                                                                          |              |              |  |
| Lead                      | ≤3 mg/kg                                                                                                                                                                                 | Not detected | AAS          |  |
| Arsenic                   | ≤1 mg/kg                                                                                                                                                                                 | Not detected | AAS          |  |
| Cadmium                   | ≤1 mg/kg                                                                                                                                                                                 | Not detected | AAS          |  |
| Mercury                   | < 0.1 mg/kg                                                                                                                                                                              | Not detected | AAS          |  |
| *Microbiology             |                                                                                                                                                                                          |              |              |  |
| Total Bacterial Count     | ≤1000cfu/g                                                                                                                                                                               | Conform      | EP<br>2.6.12 |  |
| Yeast and Molds           | ≤100cfu/g                                                                                                                                                                                | Conform      | EP<br>2.6.12 |  |
| Coliform                  | < 0.3MPN/g                                                                                                                                                                               | Negative     | EP<br>2.6.12 |  |
| Salmonella                | Negative/25g                                                                                                                                                                             | Negative     | EP<br>2.6.13 |  |
| Staphylococcus Aureus     | Negative/10g                                                                                                                                                                             | Negative     | EP<br>2.6.13 |  |

Conclusion: Conform to EP 8.0  
 Remarks: \*Test periodically to ensure requirements are met.  
 Specification: 700IU

22/01/19

Vit. B6

| Document                                | Revision Status | Page   |
|-----------------------------------------|-----------------|--------|
| Specification / Certificate of Analysis | 04              | 1 of 3 |

| Specification | Version | Date       | Name         | Sign             |
|---------------|---------|------------|--------------|------------------|
| released QA   | 0001    | 29.12.2016 | Ellen Biskup | <i>E. Biskup</i> |

| Pyridoxal-5-Phosphate |                         |              |            |
|-----------------------|-------------------------|--------------|------------|
| Quality               |                         |              |            |
| Synonyma              | PLP, P5P                | Product Code | 13572      |
| Chemical Data         | C8H10NO6P*H2O; Mr 265.2 | Batch-No.    | C041804804 |

| Definition |                     |
|------------|---------------------|
|            | Vitamin B6 derivate |

| Origin/Synthesis (short description) |  |
|--------------------------------------|--|
|                                      |  |

| Characters | Reference | Requirements                                                          | Observations |
|------------|-----------|-----------------------------------------------------------------------|--------------|
| Appearance | Internal  | Powder                                                                | Complies     |
| Colour     | Internal  | Pale yellow                                                           | Complies     |
| Solubility | Internal  | Sparingly soluble in water, soluble in solutions of alkali hydroxides | Complies     |

| Assay / Ratio                    | Reference | Requirements     | Observations |
|----------------------------------|-----------|------------------|--------------|
| Assay (calc. on dried substance) | Internal  | 98.5 % - 101.0 % | 99.3 %       |
| Purity (HPLC)                    | Internal  | Min. 99.0 %      | 99.3 %       |

| Identification | Reference | Requirements                      | Observations |
|----------------|-----------|-----------------------------------|--------------|
| IR             | Internal  | Corresponds to reference spectrum | Complies     |
| Melting point  | Internal  | 140.0 °C - 145.0 °C               | 144.0°       |

| Tests                       | Reference | Requirements           | Observations |
|-----------------------------|-----------|------------------------|--------------|
| Moisture                    | Internal  | Max. 10.0 %            | 8.7 %        |
| pH (0.25 % in water)        | Internal  | 2.6 - 3.0              | 2.8          |
| Organic volatile impurities | Internal  | Complies to USP28      | Complies     |
| Residue organic solvent     | Internal  | Max. 100 ppm           | Complies     |
| Particle size               | Internal  | Min. 95 % pass 30 mesh | Complies     |

| Certificate of Analysis |             | Date       | Name           | Sign              |
|-------------------------|-------------|------------|----------------|-------------------|
|                         | released QA | 08.08.2018 | Sabine Schwarz | <i>S. Schwarz</i> |



22/01/19

VIT BG

| Document                                | Revision Status | Page   |
|-----------------------------------------|-----------------|--------|
| Specification / Certificate of Analysis | 04              | 2 of 3 |

| Specification | Version | Date       | Name         | Sign          |
|---------------|---------|------------|--------------|---------------|
| released QA   | 0001    | 29.12.2016 | Ellen Biskup | <i>Biskup</i> |

| Pyridoxal-5-Phosphate |                         |              |            |
|-----------------------|-------------------------|--------------|------------|
| Quality               |                         |              |            |
| Synonyma              | PLP, P5P                | Product Code | 13572      |
| Chemical Data         | C8H10NO6P*H2O; Mr 265.2 | Batch-No.    | C041804804 |

| Tests          | Reference | Requirements | Observations   |
|----------------|-----------|--------------|----------------|
| Bulk density   | Internal  | Report data  | 0.45 g/ml      |
| Tapped density | Internal  | Report data  | 0.67 g/ml      |
| Heavy metals   | Internal  | Max. 10 ppm  | Complies       |
| Arsenic        | Internal  | Max. 2 ppm   | 0.1 ppm        |
| Lead           | Internal  | Max. 3 ppm   | Not detectable |
| Mercury        | Internal  | Max. 0.1 ppm | Not detectable |
| Cadmium        | Internal  | Max. 1 ppm   | Not detectable |

| Manufacturing and Release Data | Requirements   | Observations |
|--------------------------------|----------------|--------------|
| Manufacturing date             |                | 03/2018      |
| Analysis date                  |                |              |
| Retest Schedule                | Min. 24 months | 03/2020      |

| Storage    | Reference | Requirements                       |
|------------|-----------|------------------------------------|
| Containers | Internal  | Tightly closed, cool, dark and dry |

| Further remarks                                                |
|----------------------------------------------------------------|
| Appended information without quality change; 26.06.2017 Biskup |

| Regulatory Data                                                                                                                                                                                                                                                                                                                                                                                                                                                                                                                   | (acc. to supplier information and sampling/testing plans within scope of due care) |
|-----------------------------------------------------------------------------------------------------------------------------------------------------------------------------------------------------------------------------------------------------------------------------------------------------------------------------------------------------------------------------------------------------------------------------------------------------------------------------------------------------------------------------------|------------------------------------------------------------------------------------|
| Not a hazardous substance acc. to EC reg. 1272/2008 and 1907/2006. MSDS not required.<br>Product has not been subjected to irradiation.<br>Free of BSE/TSE (Bovine/Transmissible Spongiforme Encephalopathy).<br>No obligation of GMO labelling as defined in EC reg. 1829/2003 / 1830/2003.<br>Conform to contaminants reg. (EC) 1881/2006 and amendments as far as applicable.<br>Free of allergens subject to labelling acc. to EU reg. 1169/2011.<br>No obligation of nano material labelling as defined in EU reg. 1169/2011 |                                                                                    |

| Certificate of Analysis | Date       | Name           | Sign              |
|-------------------------|------------|----------------|-------------------|
| released QA             | 08.08.2018 | Sabine Schwarz | <i>S. Schwarz</i> |

|                                                |                        |             |
|------------------------------------------------|------------------------|-------------|
| <b>Document</b>                                | <b>Revision Status</b> | <b>Page</b> |
| <b>Specification / Certificate of Analysis</b> | 04                     | 3 of 3      |

|                      |                |             |              |               |
|----------------------|----------------|-------------|--------------|---------------|
| <b>Specification</b> | <b>Version</b> | <b>Date</b> | <b>Name</b>  | <b>Sign</b>   |
| released QA          | 0001           | 29.12.2016  | Ellen Biskup | <i>Biskup</i> |

|                              |                         |              |            |
|------------------------------|-------------------------|--------------|------------|
| <b>Pyridoxal-5-Phosphate</b> |                         |              |            |
| Quality                      |                         |              |            |
| Synonyma                     | PLP, P5P                | Product Code | 13572      |
| Chemical Data                | C8H10NO6P*H2O; Mr 265.2 | Batch-No.    | C041804804 |

|                                                                                                                                                                                                                                                                             |
|-----------------------------------------------------------------------------------------------------------------------------------------------------------------------------------------------------------------------------------------------------------------------------|
| <b>Regulatory Data</b>                                                                                                                                                                                                                                                      |
| <p>Conforms EC reg. 178/2002 for food raw materials conc. food safety, traceability, hygiene management.</p> <p>Suitable for vegetarian and vegan food. Produced without the use of products of animal origin.</p> <p>Without use of palm oil and palm oil derivatives.</p> |

Vit B6

**NATUR-FARMA S.R.L.**  
 Via Mazzini 29/F 37040 Pressana (VR)  
 C.F./P.Iva : 04022190237  
 info@naturfarma.it Tel.0442 411196

*22/01/19*

|                                |             |                |                   |
|--------------------------------|-------------|----------------|-------------------|
| <b>Certificate of Analysis</b> | <b>Date</b> | <b>Name</b>    | <b>Sign</b>       |
| released QA                    | 08.08.2018  | Sabine Schwarz | <i>S. Schwarz</i> |

**NATUR-FARMA S.R.L.**  
Via Mazzini 29/F 37040 Pressana (VR)  
C.F / P. Iva : 04022190237  
info@naturfarma.it Tel. 0442 411196

24/01/19

TE' VERDE E.S.

## TE' VERDE 95% POLIFENOLI 65% CATECHINE

### CERTIFICATO DI ANALISI

Codice: LiP00074

|                                 |                                       |
|---------------------------------|---------------------------------------|
| Lotto                           | 170326                                |
| Data di scadenza                | 26/03/2020                            |
| Nome prodotto                   | Tè verde 95% Polifenoli 65% Catechine |
| Nome botanico                   | Camelia Sinensis (L.) Kuntze          |
| Famiglia botanica               | Theaceae                              |
| Numero CAS                      | 84650-60-2                            |
| Solvente d'estrazione           | Acqua, etanolo                        |
| Rapporto E/D                    | 1:45/50                               |
| Eccipienti                      | Maltodestina da mais                  |
| Sostanze ausiliarie             | <= 0.5% silice colloidale anidra      |
| Tipo di preparazione utilizzata | Estratto secco                        |
| Parte della pianta usata        | Foglie                                |
| Origine                         | Italia, Asia                          |
| <b>DESCRIZIONE</b>              | <b>RISULTATO</b>                      |
| Aspetto                         | Polvere fine                          |
| Colore                          | Bruno/Rossastro                       |
| Odore                           | Caratteristico                        |
| Sapore                          | Caratteristico                        |
| Identificazione                 | TLC                                   |
| Titolo: Polifenoli              | 98.65 % (metodo spettrofotometrico)   |
| Catechine totali                | 74.25% (met. HPLC)                    |
| EGCG                            | 40.1% (met. HPLC)                     |
| Granulometria                   | Conforme                              |
| Densità                         | 0.5 g/ml                              |
| Perdita all'essiccamento        | 3.10 %                                |
| Metalli pesanti                 | < 10 ppm                              |

Data:  
17/07/2018

Il presente certificato è conforme a quello del nostro fornitore. Le indicazioni sopra riportate non Vi sollevano in ogni caso dall'identificare e controllare il prodotto in relazione all'impiego da Voi previsto.

**NATUR-FARMA S.R.L.**  
Via Mazzini 29/F 37040 Pressana (VR)  
C.F./P.Iva : 04022190237  
info@naturfarma.it Tel.0442 411196

22/01/19

TE VERDE E.S.

|                                   |                                                                                                                                                                                                                                                 |
|-----------------------------------|-------------------------------------------------------------------------------------------------------------------------------------------------------------------------------------------------------------------------------------------------|
| Piombo                            | < 3 ppm                                                                                                                                                                                                                                         |
| Cadmio                            | < 1 ppm                                                                                                                                                                                                                                         |
| Mercurio                          | < 0.1 ppm                                                                                                                                                                                                                                       |
| Idrocarburi policiclici aromatici | Conforme al Reg. 1933/2015                                                                                                                                                                                                                      |
| Residuo solventi                  | Conforme alla Dir. 2009/32/CE                                                                                                                                                                                                                   |
| Pesticidi                         | Conforme al Reg. 2008/839 /CE                                                                                                                                                                                                                   |
| Aflatossine                       | Aflatossina B1 : < 5 ppb<br>Aflatossine totali (B1,B2,G1,G2): < 10 ppb                                                                                                                                                                          |
| Carica batterica (TAMC)           | Conforme                                                                                                                                                                                                                                        |
| Lieviti e Muffe(TYMC)             | Conforme                                                                                                                                                                                                                                        |
| Patogeni                          | Salmonella: assente in 25 g<br>Escherichia coli: assente in 1 g                                                                                                                                                                                 |
| Enterobacteriaceae                | < 100 cfu/g                                                                                                                                                                                                                                     |
| Conservazione                     | In luogo fresco, asciutto e ventilato, al riparo dalla luce, nei contenitori originali, ben chiusi, o in contenitori di plastica inerte.                                                                                                        |
| Note                              | Prodotto non contenente OGM (Reg. 1829/2003 - 1830/2003 CE).<br>Prodotto non irradiato. BSE/TSE FREE – Melamina conforme al Reg. Ue 594/2012. NON CONTIENE nessuno degli ingredienti riportati nell'allegato IIIbis della Direttiva 2007/68/CE. |
| GLUTEN FREE                       | Si                                                                                                                                                                                                                                              |
| Certificato Kosher                | No                                                                                                                                                                                                                                              |
| Certificato Hallal                | No                                                                                                                                                                                                                                              |
| Certificato biologico             | No                                                                                                                                                                                                                                              |
| Alimentare                        | Si                                                                                                                                                                                                                                              |

Data:  
17/07/2018

Il presente certificato è conforme a quello del nostro fornitore. Le indicazioni sopra riportate non Vi sollevano in ogni caso dall'identificare e controllare il prodotto in relazione all'impiego da Voi previsto.

**NATUR-FARMA S.R.L.**  
 Via Mazzini 29/F 37040 Pressana (VR)  
 C.F / P.Iva : 04022190237  
 info@naturfarma.it Tel.0442 411196

22/01/19

QUERCETINA

| Product and batch Information |                                            |                    |                          |
|-------------------------------|--------------------------------------------|--------------------|--------------------------|
| Product Name:                 | Quercetin                                  | Country of Origin: | China                    |
| Botanic Name:                 | Sophora Japonica L.                        | Batch:             | NT180705003              |
| Piant Part:                   | Seed                                       | Manufacture Date   | JULY 05,2018             |
| Analysis                      | 5kg/1 drums                                | Analysis Date      | JULY 05,2018             |
| Solvent extraction            | Water & ethanol                            | Excipient          | NONE                     |
| Analysis Item                 | Specification                              | Result             | Test Method              |
| Physical & Chemical Data      |                                            |                    |                          |
| Appearance                    | Crystalline powder                         | Conform            | Organoleptic             |
| Color                         | Yellow-green                               | Conform            | Visual                   |
| Odour                         | Characteristic                             | Conform            | Organoleptic             |
| Analytical Quality            |                                            |                    |                          |
| Identification                | Identical to R.S. sample                   | Identical          | HPTLC                    |
| Assay                         | NLT 98.0%                                  | 98,17%             | UV                       |
| Hydrocarbons PAHs             | less than 50ppb                            | Conform            | GC-MS                    |
| Benzo(a)pyren                 | ≤ 10 µg/kg                                 | <10 µg/kg          |                          |
| Sieve Analysis                | 100% through 80 mesh                       | Conform            | USP39 <786>              |
| Solubility                    | Practically insoluble in water             | Conform            |                          |
|                               | Soluble in aqueous alkaline sol.           | Conform            |                          |
| Water (KF)                    | 8%-12%                                     | 9,93%              | Eur.Ph.7.0 [2.5.12]      |
| Sulphated ash                 | ≤ 0.5%                                     | 0,16%              | Eur.Ph.7.0 [2.4.16]      |
| Contaminants                  |                                            |                    |                          |
| Lead (Pb)                     | ≤ 3,0 mg/kg                                | Conform            | Eur.Ph.7.0<2.2.58>ICP-MS |
| Arsenic (As)                  | ≤ 1,0 mg/kg                                | Conform            | Eur.Ph.7.0<2.2.58>ICP-MS |
| Cadmium(Cd)                   | ≤ 1,0 mg/kg                                | Conform            | Eur.Ph.7.0<2.2.58>ICP-MS |
| Mercury(Hg)                   | ≤ 0.1 mg/kg                                | Conform            | Eur.Ph.7.0<2.2.58>ICP-MS |
| Heavy metal                   | ≤ 10,0 mg/kg                               | Conform            | Eur.Ph.7.0<2.2.58>ICP-MS |
| Solvents Residue              | Meet Eur.ph.7.0 <5,4> and E.D. 2009/32/EC  | Conform            | Eur.Ph.7.0<2.4.24>       |
| Pesticides Residues           | Meet Eur.ph.7.0 <5,4> and E.D. 2008/839/CE | Conform            | Gas Chromatography       |
| Microbiological Control       |                                            |                    |                          |
| Total Plate Count             | ≤ 1000 cfu/g                               | Conform            | USP39 <61>               |
| Yeast & Mold                  | ≤ 100 cfu/g                                | Conform            | USP39 <61>               |
| E.Coli                        | Negative                                   | Conform            | USP39 <62>               |
| Salmonella                    | Negative                                   | Conform            | USP39 <62>               |
| Aflatoxins B1                 | < 2 µg/ kg                                 | Negative           | USP39 <62>               |
| Aflatoxins Σ B1, B2, G1, G2   | < 4 µg/ kg                                 | Negative           | USP39 <62>               |

**NATUR-FARMA S.R.L.**  
Via Mazzini 29/F 37040 Pressana (VR)  
C.F. / P.Iva : 04022190237  
info@naturfarma.it Tel.0442 411196

22/01/19

QUERCETINA

| General Status                                                                                  |                                                                           |         |  |
|-------------------------------------------------------------------------------------------------|---------------------------------------------------------------------------|---------|--|
| Non-irradiation                                                                                 | Conform                                                                   | Conform |  |
| GMO                                                                                             | FREE                                                                      | FREE    |  |
| BSE/TSE                                                                                         | FREE                                                                      | FREE    |  |
| Melamine                                                                                        | Complies with the Eu reg. 594/2012                                        | Conform |  |
| The products does not contain any of the ingredients listed in Annex II to Directive 1169/11. " |                                                                           |         |  |
| Packaging and storage                                                                           |                                                                           |         |  |
| Packing                                                                                         | Pack in paper-drums and two plastic-bags inside N.W. 25 kgs I.D.35xH51cm. |         |  |
| Storage                                                                                         | Store in a well-closed container away from moisture, light, oxygen.       |         |  |
| Shelf Life                                                                                      | 24 months under the conditions above and in its original packaging        |         |  |
| Expiration Date                                                                                 | JULY 04 2020                                                              |         |  |

- Revisionata il 03/09/2018

**NATUR-FARMA S.p.A.**  
 Via Mazzini 29/F 37040 Pressana (VR)  
 C.F / P.Iva : 04022190237  
 info@naturfarma.it Tel.0442 411196

22/01/19

RESVERATROL

| Product and batch Information |                                            |                    |                          |
|-------------------------------|--------------------------------------------|--------------------|--------------------------|
| Product Name:                 | Resveratrol                                | Country of Origin: | China                    |
| Botanic Name:                 | Polygonum cuspidatum                       | Batch:             | NT180402003              |
| Plant Part:                   | Root                                       | Manufacture Date   | APR 02,2018              |
| Analysis                      | 3Kg/1 drums                                | Analysis Date      | APR 02,2018              |
| Solvent extraction            | Water & ethanol                            | Excipient          | None                     |
| Analysis Item                 | Specification                              | Result             | Test Method              |
| Physical & Chemical Data      |                                            |                    |                          |
| Appearance                    | Fine powder                                | Conform            | Organoleptic             |
| Color                         | White                                      | Conform            | Visual                   |
| Odour                         | Characteristic                             | Conform            | Organoleptic             |
| Analytical Quality            |                                            |                    |                          |
| Identification                | Identical to R.S. sample                   | Identical          | HPTLC                    |
| Resveratrol                   | NLT 98.0%                                  | 98,81%             | HPLC                     |
| Hydrocarbons PAHs             | less than 50ppb                            | Conform            | GC-MS                    |
| Benzo(a)pyren                 | ≤ 10 µg/kg                                 | <10 µg/kg          |                          |
| Sieve Analysis                | 100% through 80 mesh                       | Conform            | USP39 <786>              |
| Water (KF)                    | ≤ 5.0%                                     | 0,19%              | Eur.Ph.7.0 [2.5.12]      |
| Total Ash                     | ≤ 5.0%                                     | 0,26%              | Eur.Ph.7.0 [2.4.16]      |
| Contaminants                  |                                            |                    |                          |
| Lead (Pb)                     | ≤ 3,0 mg/kg                                | Conform            | Eur.Ph.7.0<2.2.58>ICP-MS |
| Arsenic (As)                  | ≤ 1,0 mg/kg                                | Conform            | Eur.Ph.7.0<2.2.58>ICP-MS |
| Cadmium(Cd)                   | ≤ 1,0 mg/kg                                | Conform            | Eur.Ph.7.0<2.2.58>ICP-MS |
| Mercury(Hg)                   | ≤ 0.1 mg/kg                                | Conform            | Eur.Ph.7.0<2.2.58>ICP-MS |
| Heavy metal                   | ≤ 10,0 mg/kg                               | Conform            | Eur.Ph.7.0<2.2.58>ICP-MS |
| Solvents Residue              | Meet Eur.ph.7.0 <5,4> and E.D. 2009/32/EC  | Conform            | Eur.Ph.7.0<2.4.24>       |
| Pesticides Residues           | Meet Eur.ph.7.0 <5,4> and E.D. 2008/839/CE | Conform            | Gas Chromatography       |
| Microbiological Control       |                                            |                    |                          |
| Total Plate Count             | ≤ 1000 cfu/g                               | Conform            | USP39 <61>               |
| Yeast & Mold                  | ≤ 100 cfu/g                                | Conform            | USP39 <61>               |
| E.Coli                        | Negative                                   | Conform            | USP39 <62>               |
| Salmonella                    | Negative                                   | Conform            | USP39 <62>               |
| Aflatoxins B1                 | < 2 µg/ kg                                 | Negative           | USP39 <62>               |
| Aflatoxins Σ B1, B2, G1, G2   | < 4 µg/ kg                                 | Negative           | USP39 <62>               |

**NATUR-FARMA S.R.L.**  
Via Mazzini 29/F 37040 Pressana (VR)  
C.F / P.Iva : 04022190237  
info@naturfarma.it Tel.0442 411196

22/01/19

RGSUBATEOLO

| General Status                                                                                     |                                                                           |         |  |
|----------------------------------------------------------------------------------------------------|---------------------------------------------------------------------------|---------|--|
| Non-irradiation                                                                                    | Conform                                                                   | Conform |  |
| GMO                                                                                                | FREE                                                                      | FREE    |  |
| BSE/TSE                                                                                            | FREE                                                                      | FREE    |  |
| Melamine                                                                                           | Complies with the Eu reg. 594/2012                                        | Conform |  |
| The products does not contain any of the ingredients listed in Annex II to Directive 1169/11.<br>" |                                                                           |         |  |
| Packaging and storage                                                                              |                                                                           |         |  |
| Packing                                                                                            | Pack in paper-drums and two plastic-bags inside N.W. 25 kgs I.D.35xH51cm. |         |  |
| Storage                                                                                            | Store in a well-closed container away from moisture, light, oxygen.       |         |  |
| Shelf Life                                                                                         | 24 months under the conditions above and in its original packaging        |         |  |
| Expiration Date                                                                                    | APR 01 2020                                                               |         |  |

- Revisionata il 03/09/2018



22/01/19

N-ACETIL-L-CISTEINA

|          |                                 |
|----------|---------------------------------|
| Prodotto | N-ACETIL-L-CISTEINA (NO A.P.I.) |
| Codice   | 012750                          |

**SPECIFICHE**

|                                                 |                                    |
|-------------------------------------------------|------------------------------------|
| Aspetto                                         | Polvere cristallina bianca o quasi |
| Identificazione IR                              | Conforme                           |
| Titolo(%)                                       | 98,5-101,0                         |
| Perdita alla calcinazione(ceneri solforiche)(%) | 0,2 max.                           |
| Cloruri(%)                                      | 0,04 max.                          |
| Solfati(%)                                      | 0,03 max.                          |
| Ammonio (%)                                     | 0,02 max.                          |
| Ferro(ppm)                                      | 20 max.                            |
| Piombo(ppm)                                     | 1 max.                             |
| Arsenico(ppm)                                   | 0,5 max.                           |
| Cadmio (ppm)                                    | 0,5 max.                           |
| Mercurio (ppm)                                  | 0,1 max.                           |
| Zinco(ppm)                                      | 10 max.                            |
| Metalli pesanti(ppm)                            | 10 max.                            |
| Impurezze individuali(%)                        | 0,5 max.                           |
| Impurezze totali(%)                             | 2,0 max.                           |
| Potere rotatorio (°) (20°C)                     | 21,3-27,0                          |
| pH                                              | 2,0-2,8                            |
| Perdita all'essiccamento(%)                     | 0,5 max.                           |
| <b>ANALISI MICROBIOLOGICA</b>                   |                                    |
| Carica batterica (CFU/g)                        | 1000 max.                          |
| Lieviti e muffe/g                               | 100 max.                           |
| Enterobatteri/10g                               | Negativo                           |
| Salmonella/10g                                  | Negativo                           |
| Coliformi(CFU/g)                                | Negativo                           |
| E.Coli/g                                        | Negativo                           |
| Stafilococcus aureus(CFU/g)                     | Negativo                           |
| Bacillus sp./g                                  | Negativo                           |
| Clostridium sporogenes (g)                      | Negativo                           |
| Il prodotto è conforme a                        | EP-USP(ed.correnti)                |
| Il prodotto è conforme a                        | AJI (ed.corrente)                  |

|                            |            |
|----------------------------|------------|
| Data                       | 12/06/2018 |
| Codice                     | 012750     |
| Versione 00 del 12/06/2018 |            |

22/01/19

N-ACETIL - L - CISTEINA

**CERTIFICATO D'ANALISI**  
CERTIFICATE OF ANALYSIS

**PRODOTTO**  
PRODUCT

**N - ACETIL - L - CISTEINA**  
(N.ACETYL-L-CYSTEINE)

**QUANTITA'**  
**BATCH**

IADF180307

Kg. 5

COD. AC015

**CONF.**

1 conf.da kg.5

**SCAD.**

03.2021

|                     |                                      |
|---------------------|--------------------------------------|
| DESCRIPTION         | WHITE CRYSTALS OR CRYSTALLINE POWDER |
| IDENTIFICATION      | POSITIVE (IR)                        |
| SPECIFIC ROTATION   | + 25.30° (+21.3 / +27.0°)            |
| PH                  | 2.17 (2.0-2.8)                       |
| HEAVY METALS        | < 10 ppm                             |
| As                  | < 0,5 ppm                            |
| Pb                  | < 1 ppm                              |
| Cd                  | < 0,5 ppm                            |
| Hg                  | < 0,1 ppm                            |
| IRON                | < 20 ppm                             |
| ZINC                | < 10 ppm                             |
| PARTICLE SIZE       | 80% PASS 20 MESH                     |
| TOTAL IMPURITIES    | < 2,0%                               |
| TOTAL PLATE COUNT   | CONFORM (<=1000 cfu/g)               |
| YEAST AND MOULD     | CONFORM (<=100 cfu/g)                |
| E.COLI              | NEGATIVE                             |
| SALMONELLA          | NEGATIVE                             |
| LOSS ON DRYING      | 0,11%                                |
| RESIDUE ON IGNITION | 0,05%                                |
| ASSAY               | 100,01% (98,5 - 101,0%)              |

COPY OF THE ORIGINAL DOCUMENT, VALID ALTHOUGH NOT SIGNED.

09.2018

**NATUR-FARMA S.R.L.**  
Via Mazzini 29/F 37040 Pressana (VR)  
C.F / P.Iva : 04022190237  
info@naturfarma.it Tel.0442 411196

22/01/19

VIT. C

**CERTIFICATE OF ANALYSIS**

**Product Name:** VITAMIN C (ASCORBIC ACID)  
**CCL Product Code:** P2213

Batch Number 6052331711179  
Date of Manufacture 23/11/2017  
Re-Test Date 22/11/2020  
CAS No 50-81-7  
Molecular Formula  $C_6H_8O_6$   
EC/EINECS Number 200-066-2  
Source Fermented on Sorbitol Ex Corn (Vegetable)  
Country of Origin China  
Compound Ingredient None  
Country of Manufacture China  
Suitable for Vegetarians Suitable  
Suitable for Vegans Suitable  
FEMAS (Feed Materials Assurance Scheme) Assured Yes

| <b><u>Test</u></b>           | <b><u>Specification</u></b> | <b><u>Result</u></b> |
|------------------------------|-----------------------------|----------------------|
| Appearance                   | Crystals/Crystalline Powder | Conforms             |
| Colour                       | White to off White          | Conforms             |
| Aroma                        | Characteristic              | Conforms             |
| Flavour                      | Characteristic              | Conforms             |
| Identification               | Positive                    | Conforms             |
| Assay                        | 99.0%-100.5%                | 99.9%                |
| Loss on Drying               | Approximately 1%            | 0.04%                |
| pH                           | 2.1-2.6                     | 2.5                  |
| Residual Solvents (Methanol) | Max 3,000ppm                | Conforms             |
| Lead (Pb)                    | Max 3ppm                    | <2.0ppm              |
| Cadmium (Cd)                 | Max 1ppm                    | <1.0ppm              |
| Arsenic (As)                 | Max 1ppm                    | <1.0ppm              |
| Mercury (Hg)                 | Max 0.1ppm                  | <0.1ppm              |
| Copper (Cu)                  | Max 5ppm                    | <5.0ppm              |
| Iron (Fe)                    | Max 2ppm                    | <2.0ppm              |
| Total Plate Count (TVC)      | Max 1,000cfu/g              | <1,000cfu/g          |
| Yeast & Moulds               | Max 100cfu/g                | <100cfu/g            |
| E.Coli                       | Max 10cfu/g                 | Negative             |
| Salmonella                   | Negative                    | Negative             |

Product Code: Pxxxx

Version: 1

Page 1 of 2

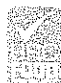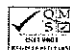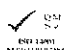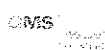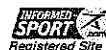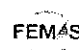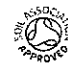

**NATUR-FARMA S.R.L.**  
 Via Mazzini 29/F 37040 Pressana (VR)  
 C.F / P.Iva : 04022190237  
 info@naturfarma.it Tel.0442 411196

22/01/19

Vit. C

|                    |                |                |
|--------------------|----------------|----------------|
| GMO Status         | Non-GMO        | Non GMO        |
| Irradiation Status | Non Irradiated | Non Irradiated |
| TSE/BSE Status     | TSE/BSE Free   | TSE/BSE Free   |

This material conforms to the BP Standard.

This material is to be stored in a tightly sealed bag/container and to be kept in a cool place away from moisture and direct sunlight.

Please note that surveillance testing may mean that not all the parameters stated on this specification are tested for every batch.

We confirm that the information above is sourced from the original manufacturers/suppliers Batch Certificate of Analysis.

The specifications detailed in this COA conform with Version 9 of our Technical Dossier for Vitamin C (Ascorbic Acid).

To be used as per local legislation.

**Change History**

| Version | Change      | Customer Notification required Yes / No |
|---------|-------------|-----------------------------------------|
| 1       | First Issue | N/A                                     |

**Document Approval**

| Task        | Role          | Name      | Sign             | Date       |
|-------------|---------------|-----------|------------------|------------|
| Approved By | QC Technician | M. Sosnin | <i>M. Sosnin</i> | 09/03/2018 |

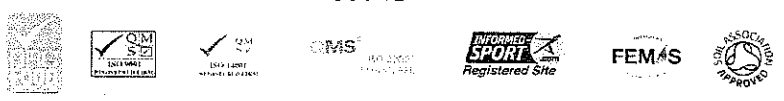

NATUR-FARMA S.R.L.  
Via Mazzini 29/F 37040 Pressana (VR)  
C.F / P.Iva : 04022190237  
info@naturfarma.it Tel.0442 411196

22/01/19

AC. ALFA LIPOICO

**CERTIFICATE OF ANALYSIS**

|                            |                                                              |                      |
|----------------------------|--------------------------------------------------------------|----------------------|
| Product Name:              | ALPHA LIPOIC ACID (DC Grade)                                 |                      |
| CCL Product Code:          | P34176                                                       |                      |
| Batch Number               | ALA.1406231                                                  |                      |
| Molecular Formula          | C <sub>8</sub> H <sub>14</sub> O <sub>2</sub> S <sub>2</sub> |                      |
| <b><u>Test</u></b>         | <b><u>Specification</u></b>                                  | <b><u>Result</u></b> |
| Appearance                 | Granular                                                     | Conforms             |
| Colour                     | Yellowish                                                    | Conforms             |
| Assay (by HPLC USP Method) | 99.0% - 101.0%                                               | 99.5%                |
| Melting Point              | 60°C – 62°C                                                  | 62°C                 |
| Total Impurity             | Max 0.5%                                                     | 0.05%                |
| Individual Impurities      | Max 0.10%                                                    | 0.04%                |
| Particle size              | 20-60 Mesh                                                   | Complies             |
| Loss on Drying             | Max 0.5%                                                     | 0.1%                 |
| Residue on Ignition        | Max 0.10%                                                    | 0.04%                |
| Heavy Metals               | Max 10ppm                                                    | <10ppm               |
| Lead                       | Max 3ppm                                                     | <3ppm                |
| Arsenic                    | Max 1ppm                                                     | <1ppm                |
| Cadmium                    | Max 1ppm                                                     | <1ppm                |
| Mercury                    | Max 0.1ppm                                                   | <0.1ppm              |
| Cyclohexane                | Max 2000ppm                                                  | 614ppm               |
| Toluene                    | Max 30ppm                                                    | Not Detectable       |
| Ethyl acetate              | Max 250ppm                                                   | 42 ppm               |

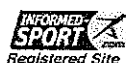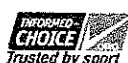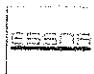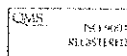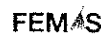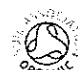

success starts with the finest ingredients...

**NATUR-FARMA S.R.L.**  
Via Mazzini 29/F 37040 Pressana (VR)  
C.F / P.Iva : 04022190237  
info@naturfarma.it Tel.0442 411196

22/01/19

Ac. ALFA LIPOICO

**ALPHA LIPOIC ACID -Continued**

| <b><u>Test</u></b>      | <b><u>Specification</u></b> | <b><u>Result</u></b> |
|-------------------------|-----------------------------|----------------------|
| Total Plate Count (TVC) | Max 1,000cfu/g              | <10cfu/g             |
| Yeast & Moulds          | Max 100cfu/g                | <10cfu/g             |
| E.Coli                  | Absent/g                    | Not Detectable       |
| Salmonella              | Absent/g                    | Not Detectable       |
| GMO Status              | Non-GMO                     | Non-GMO              |
| Irradiation Status      | Non Irradiated              | Non Irradiated       |

This material conforms to the USP

This material is to be stored in a tightly sealed bag/container and to be kept in a cool place away from moisture and direct sunlight.

We confirm that the information above is sourced from the original manufacturers/suppliers Batch Certificate of Analysis.

To be used as per local legislation

**QA Approval**

Signature: 

Checked By: Jason Gibbons

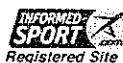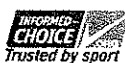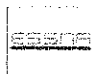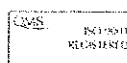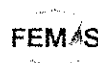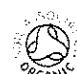

success starts with the finest ingredients...
